1  
2 **Prevalent and Dynamic Binding of the Cell Cycle Checkpoint Kinase**  
3 **Rad53 to Gene Promoters**

4  
5 Yi-Jun Sheu, Risa Karakida Kawaguchi, Jesse Gillis and Bruce Stillman<sup>1</sup>

6  
7 Cold Spring Harbor Laboratory, 1 Bungtown Road, Cold Spring Harbor, NY 11724, USA

8  
9 <sup>1</sup>Correspondence: Bruce Stillman [stillman@cshl.edu](mailto:stillman@cshl.edu)

10  
11 Key words: Origins of DNA replication, Transcription start sites, Gene promoters, Checkpoint Kinase,  
12 Rad53, Mrc1, DNA damage response, Stress Response

13  
14  
15 **Abstract**

16  
17 Replication of the genome must be coordinated with gene transcription and cellular metabolism.  
18 These processes are controlled in part by the Rad53 (CHEK2 in mammals) checkpoint kinase and the  
19 Mrc1 replisome component, especially following replication stress in the presence of limiting  
20 deoxyribonucleotides. We examined cell cycle regulated, genome-wide binding of Rad53 to  
21 chromatin. The kinase bound to sites of active DNA replication initiation and fork progression, but  
22 unexpectedly to the promoters of numerous genes (>20% of all genes) involved in many cellular  
23 functions. At some genes, Rad53 promoter binding correlated with changes in gene expression.  
24 Rad53 promoter binding to certain genes is influenced by sequence-specific transcription factors and  
25 less by checkpoint signaling. In checkpoint mutants, untimely activation of late-replicating origins  
26 reduces the transcription of nearby genes, with concomitant localization of Rad53 to their gene bodies.  
27 We suggest that the Rad53 checkpoint kinase coordinates genome-wide replication and transcription  
28 under stress conditions.  
29

## 30 Introduction

31

32 Eukaryotic cells initiate DNA synthesis in a temporally controlled manner from multiple replication  
33 origins to ensure efficient duplication of the genome (Bell and Labib, 2016; Renard-Guillet et al.,  
34 2014). During the course of replication, replisomes have to deal with both endogenous and  
35 exogenous stresses that can cause stalling of replication forks. The same DNA template is also  
36 transcribed, potentially creating conflicts between replication and transcription that can lead to  
37 detrimental effects on genome stability and cell viability (Hamperl and Cimprich, 2016).

38

39 To maintain genome stability during S-phase, the budding yeast *S. cerevisiae* activates a DNA  
40 replication checkpoint (DRC) in response to replication stress via the sensor kinase Mec1 (the  
41 mammalian ATM/ATR), the replication fork protein Mrc1 (Claspin in mammals) and other fork  
42 proteins (Lanz et al., 2019; Osborn and Elledge, 2003; Pardo et al., 2017; Paulovich and Hartwell,  
43 1995; Saldivar et al., 2017). A second DNA damage checkpoint (DDC) mediated by Rad9 (TP53BP1  
44 in mammals) responds to double strand DNA breaks. Both branches converge on the effector kinase  
45 Rad53 (CHEK2 in mammals) which triggers a wide range of downstream events, including stopping  
46 cell cycle progression, preventing late origin firing, activating the DNA repair and elevating synthesis  
47 of deoxyribonucleoside triphosphates (dNTP). The signaling also promotes widespread changes in  
48 gene expression (Jaehnig et al., 2013; Pardo et al., 2017).

49

50 Unlike most of the checkpoint genes, both Mec1 and Rad53 kinases are essential for cell viability in  
51 unperturbed cells that can be partly explained by their role in regulating dNTP pools (Desany et al.,  
52 1998; Forey et al., 2020; Zhao et al., 2000). However, it is important to note that kinase null mutants  
53 are extremely sick and sensitive to various type of exogenous stress. Under the bypass conditions in  
54 cells without Sml1, the inhibitor of ribonucleotide reductase (RNR), cells lacking Rad53 exhibit a  
55 more severe defect than cells lacking Mec1, implying that Rad53 has activities beyond checkpoint  
56 signaling. Consistent with this suggestion, the kinase deficient mutant *rad53<sup>K227A</sup>* lacks checkpoint  
57 function but retains growth-associated activity (Gunjan and Verreault, 2003; Hoch et al., 2013;  
58 Holzen and Sclafani, 2010; Pelliccioli et al., 1999).

59

60 Rad53 is central to the transcriptional response to DNA damage, including the Dun1 protein kinase  
61 acting downstream of Rad53 to phosphorylate and inactivate the transcriptional repressor Rfx1/Crt1  
62 and thereby up-regulate target genes (Huang et al., 1998), such as *RNR2*, *RNR3*, and *RNR4*, all  
63 encoding subunits of RNR. However, the induced expression of *RNR1*, which encodes the major  
64 isoform of the RNR large subunit, is not controlled by the Rfx1 repressor, but by Ixr1 binding to the  
65 *RNR1* promoter upon genotoxic stress. This Ixr1-dependent regulation of *RNR1* is independent of  
66 Dun1 but requires Rad53 (Tsaponina et al., 2011). Another Rad53-dependent, Dun1-independent  
67 regulation of *RNR1* involves phosphorylation-dependent dissociation of Nrm1 from MBF (Travesa et  
68 al., 2012).

69

70 In addition to upregulating the dNTP pools, defects in cells lacking Rad53 can be suppressed by  
71 manipulating factors functioning in transcription regulation, cell wall maintenance, proteolysis and  
72 cell cycle control (Desany et al., 1998; Manfrini et al., 2012). Moreover, Rad53 kinase targets and  
73 interaction partners found in biochemical and proteomic studies suggests that the kinase is pleiotropic  
74 (Gunjan and Verreault, 2003; Jaehnig et al., 2013; Lao et al., 2018; Smolka et al., 2007, 2006).

75

76 In this study, while investigating of the response of yeast cells to replication stresses caused by  
77 depletion of dNTPs, we found that Rad53 not only binds to sites of DNA synthesis, but it localized to  
78 more than 20% of gene promoters in the *S. cerevisiae* genome, suggesting a global role in  
79 coordinating stress responses. Furthermore, we provide evidence that untimely activation of  
80 replication from late origins can negatively affect transcription activity of nearby genes.

81

## 82 **Results**

83

### 84 **Initiation, elongation and recovery of DNA replication in checkpoint mutants**

85

86 DNA replication in the presence of low dNTP levels was examined by releasing G1-phase cells for  
87 either 45 (HU45) or 90 (HU90) minutes into media containing hydroxyurea (HU), coupled with  
88 labeling DNA synthesis with 5-ethynyl-2'-deoxyuridine (EdU) (Sheu et al., 2016, 2014). The purified  
89 EdU-DNA was subjected to high-throughput DNA sequencing and the reads were mapped to the  
90 genome, yielding replication profiles for wild-type (WT) and three DNA damage checkpoint mutants,  
91 *rad53<sup>K227A</sup>* (a kinase-deficient version of Rad53), *mrc1Δ* (null for *Mrc1* mediator of the DRC branch)  
92 and *rad9Δ* (null for *Rad9* mediator of DDC branch).

93

94 In WT cells, DNA synthesis occurred only from early origins because of the activated DRC  
95 checkpoint, which inhibits late origin firing (Figure 1a, [HU90] and Figure 1-figure supplement 1a  
96 [HU45 and HU90])<sup>5,6</sup>. As expected DNA synthesis was readily detected from late origins (red  
97 arrows) in the kinase-deficient *rad53<sup>K227A</sup>* and *mrc1Δ* mutants. In contrast, the *rad9Δ* mutant profile  
98 appeared identical to that of WT (Figure 1a). Thus, the DRC branch (*Mrc1*), but not the DDC branch  
99 (*Rad9*), represses late origin firing in response to this replication stress.

100

101 Among the 829 active or potential origins of DNA replication (Siow et al., 2012), 256 origins are  
102 active in WT cells and 521 origins are active in the *rad53<sup>K227A</sup>* and *mrc1Δ* mutants, specifying “early”  
103 (E) and “late” (L) firing origins, respectively. The remaining 308 were therefore inactive (I) under  
104 these conditions. The EdU peak signals in each mutant for these origin categories shows that the  
105 *rad53<sup>K227A</sup>* mutant favored late origins over early origins (Figure 1b), which was particularly  
106 prominent in heterochromatic regions on chromosome III, such as *HMR*, *HML* and telomere-proximal  
107 regions harboring very late firing origins (Figure 1-figure supplement 1b). This pattern is not seen in  
108 the *mrc1Δ*, suggesting that it is due to loss of Rad53 kinase activity but not DRC signaling.

109

110 Rad53 is required for stability of DNA stalled replication forks (Bacal et al., 2018; Kumar and  
111 Huberman, 2008; Lopes et al., 2001; Seiler et al., 2007; Tercero et al., 2003), which was confirmed  
112 by labelling DNA synthesis during recovery from HU-induced replication stress. Cells that  
113 progressed from G1- into S-phase in HU for 45 min. were released from the HU block and DNA  
114 synthesis labeled with EdU during an additional 25 min (HU→S25) or were continued in HU for  
115 another 45 min. and labeled with EdU (HU→HU45) (Figure 1c). In WT cells, DNA synthesis during  
116 recovery from HU continued from the stalled replication forks (Figure 1d). For very efficient early  
117 origins, such as *ARS305*, *ARS306* and *ARS307* (Figure 1d, black arrows), little new synthesis  
118 occurred at origins during the recovery, suggesting efficient initiation at these origins. In contrast, for  
119 moderately early origins, such as *ARS309* and *ARS315* (Figure 1d, brown arrows), DNA synthesis  
120 occurs at both the origin and recovered forks in the cell population. DNA synthesis from late origins

121 is not detectable (Figure 1d, red arrows). Thus, in *WT*, DNA synthesis during recovery from  
122 replication stress continued mainly from already activated replisomes that had progressed away from  
123 origins. If the replication stress persisted, DNA synthesis continued slowly only from existing  
124 replisomes (Figure 1d).

125  
126 In the recovering *mrc1Δ* mutant, DNA synthesis continued from stalled replisomes, albeit slowly, but  
127 unlike *WT*, new initiation at efficient early origins, such as *ARS305*, *ARS306* and *ARS307* was also  
128 detected (Figure 1d), suggesting that Mrc1 is important for efficient initiation at early origins in  
129 addition to its established role in stimulating fork progression (Osborn and Elledge, 2003; Tourrière  
130 et al., 2005; Yeeles et al., 2016). During recovery from stress, the *rad53<sup>K227A</sup>* mutant failed to restart  
131 DNA synthesis at most stalled forks, except for the replicons in the heterochromatic regions, where  
132 new initiation was also detected (Figure 1d). Thus, the replication fork collapse was more severe in  
133 the absence of Rad53 kinase compared to the absence of checkpoint signaling in the *mrc1Δ* mutant.

134

### 135 **Rad53 is recruited to sites of DNA synthesis independent of checkpoint** 136 **signaling**

137

138 To investigate the status of replisomes, chromatin immunoprecipitation and deep sequencing (ChIP-  
139 seq) was employed to follow localization of Cdc45, which is associated with activated helicases at the  
140 replisomes. G1 arrested cells and cells released for 45 and 90 min. in HU were processed for ChIP-  
141 seq analysis (Behrouzi et al., 2016).

142

143 Using either normalized read counts or a heatmap analysis around active origins that are ranked in  
144 order of DNA replication timing<sup>28</sup>, Cdc45 in *WT* cells was found moving only from early origins,  
145 (Figure 2a and 2b; early origins in top panel and late origins in bottom panel). In contrast, Cdc45 is  
146 present at both early and late origins in both *rad53<sup>K227A</sup>* and *mrc1Δ* mutants, with slower progression  
147 in the *mrc1Δ* mutant (Figure 2b; Figure 2- figure supplement 1a), consistent with its role in  
148 progression at replication forks (Tourrière et al., 2005; Yeeles et al., 2016). Cdc45 in the *rad53<sup>K227A</sup>*  
149 mutant emanating from late origins continued to move from HU45 to HU90, whereas at the early  
150 origins Cdc45 signal did not move further away for origins (Figure 2b). Since Cdc45 can recruit  
151 Rad53 to restrict CMG helicase activity (Can et al., 2018; Devbhandari and Remus, 2020), the limited  
152 Cdc45 signal at early origins here suggests that, in the absence of active Rad53 kinase, replisomes  
153 departed from origins but disintegrated. The persistent signal at origins in HU90 is consistent with  
154 firing at early origins in those cells that had not initiated DNA replication during the HU block.

155

156 Phosphorylation of histone H2A at serine 129 (S129;  $\gamma$ -H2A) by the sensor kinase Mec1 is an  
157 indication of checkpoint activation.  $\gamma$ -H2A ChIP-seq monitors the genome distribution of checkpoint  
158 activation under HU stress (Figure 2c and d; Figure 2 – figure supplement 1b). In *WT* cells,  $\gamma$ -H2A  
159 signals are particularly high around the earliest firing origins in HU45 and HU90, suggesting that  
160 stress signals emit mostly from early origins. In the *rad53<sup>K227A</sup>* and *mrc1Δ* mutants,  $\gamma$ -H2A is found at  
161 both early and late origins, however, in the *rad53<sup>K227A</sup>* mutant, the signal at early firing origins  
162 reduces with time, suggesting that Rad53 kinase activity is needed to maintain stress signaling by  
163 Mec1 at early origins. In contrast, the Mrc1 is not strictly required to induce or maintain  $\gamma$ -H2A.

164

165 Interestingly,  $\gamma$ -H2A is observed at genomic regions surrounding the very late origins in G1-phase in  
166 both WT and mutants (Figure 2d and Figure 2 – figure supplement 1b). It is possible that these  $\gamma$ -  
167 H2A signals reflect a low level of ssDNA gaps at these late-replicating regions that was tolerated and  
168 carried over from the previous cell cycle, similar to unrepaired post-replication gaps resulting from  
169 low level of UV irradiation in *S. pombe* G2-phase (Callegari and Kelly, 2006).

170  
171 Rad53 kinase detected by ChIP-seq at genome sites in WT cells largely follows the progression of  
172 replication forks (Figure 2e and f; Figure 2 – figure supplement 1c). Rad53 is also detected at late  
173 origins in both checkpoint mutants, but dispersed at late times in the *rad53*<sup>K227A</sup> mutant. The  
174 spreading of Rad53 signal in the *mrc1* $\Delta$  mutant is more restricted, consistent with slower replication  
175 fork progression. Surprisingly, Rad53 binding to replication forks does not require the Mrc1,  
176 suggesting checkpoint-independent recruitment of Rad53 to sites of DNA synthesis.

177

### 178 **Rad53 binds to promoters of genes involved in multiple cellular processes**

179  
180 Unexpectedly, we noticed many Rad53 peaks even in G1 arrested cells (Figure 2e) and many of these  
181 peaks localized upstream of transcription start sites (TSS) or promoters (Figure 3). In WT, some peak  
182 signals change as cells progress from G1-phase into HU arrested S-phase. For example, Rad53 at the  
183 *RNR1* promoter increases from G1 to HU45 and HU90 (Figure 3a and b). A similar pattern occurs at  
184 the *RNR3* promoter. The Rad53 signal at promoters are present in both *rad53*<sup>K227A</sup> and *mrc1* $\Delta$  mutants  
185 (Figure 3a). Rad53 binding to promoters also occurs in the *sml1* null mutant (*sml1* $\Delta$ ) and the *mec1*  
186 null mutant (*mec1* $\Delta$  *sml1* $\Delta$ ), but is absent in *rad53* null (*rad53* $\Delta$  *sml1* $\Delta$ ), demonstrating antibody  
187 specificity (Figure 3b and Figure 3 – figure supplement 1a). Thus, both the sensor kinase Mec1 and  
188 Mrc1 are not required for the recruitment of Rad53 to these sites.

189  
190 Whole genome analysis shows that ~90% of the Rad53 peaks are either upstream of or overlap the  
191 TSS (Figure 3 – figure supplement 1b). Rad53 promoter binding is temporally dynamic in a subset of  
192 genes, suggesting regulation by cell cycle progression or DNA replication stress. Heatmaps of the  
193 Rad53 signals at 2 kb intervals centered on all transcription start sites (TSS) show a global trend of  
194 increasing Rad53 binding as cells progress from G1-phase into HU45 or HU90 (Figure 3c),  
195 concomitant with increased levels of Rad53 protein in cells treated with HU (Figure 3 – figure  
196 supplement 2a). The increase parallels entry into S-phase, as measured by Orc6 phosphorylation,  
197 destruction of Sml1 and histone H2A phosphorylation (Figure 3 – figure supplement 2a-c).  
198 Additional genes show increased Rad53 binding as cells progress from G1- into S-phase (Figure 4a,  
199 upper panels), but at other promoters Rad53 binding decreases during the same time course (Figure  
200 4a, lower panels). However, at most genes Rad53 remains constant.

201  
202 In this study, two sets of duplicate Rad53 ChIP-Seq experiments were performed in WT, *rad53*<sup>K227A</sup>  
203 and *mrc1* $\Delta$  mutants (CP set), and based on the type of genes that bind Rad53, in transcription factor  
204 mutants *ixr1* $\Delta$ , *swi4* $\Delta$ , *swi6* $\Delta$  and WT (TP set). Residual analysis in WT identified the top  
205 differentially binding (DB) genes (Figure 4b, Figure 4c for CP and TP sets; orange dots). Among the  
206 top 1000 DBs from each set, 435 genes were identified in both (Figure 4b, 435 Top DB overlap).  
207 Overall, during the G1- to S-phase transition (HU45), there are more genes with increased Rad53  
208 promoter binding than those with decreased binding. Many of these genes encode proteins involved  
209 in cell cycle progression (e.g., cyclins and regulators of DNA replication) and cell growth (e. g., cell  
210 wall maintenance and mating response).



211  
212 In the *rad53*<sup>K227A</sup> mutant, the increase in Rad53 promoter binding is transient and generally weaker,  
213 consistent with lower protein levels (Figure 3c). In the *mrc1Δ* mutant, the binding at the *RNR1*  
214 promoter is reduced compared to WT, despite an increase Rad53 protein (Figure 3a, Figure 3 – figure  
215 supplement 2a). In contrast, the increase in Rad53 binding at the *PCL1* promoter appears to be less  
216 affected by the checkpoint mutations (Figure 3a). Thus, the DRC checkpoint only affects differential  
217 binding of Rad53 to a subset of promoters. At other promoters, cell cycle progression or response to  
218 mating pheromone due to treatment and removal of  $\alpha$ -factor may contribute to differential Rad53  
219 promoter binding.

220  
221 Visual inspection of the ChIP-Seq peaks suggested that Rad53 bound to numerous gene promoters  
222 and TSSs throughout the genome. Rad53 ChIP-Seq was compared to a previous ChIP-Seq data set of  
223 the sequence-specific transcription factor Swi6, part of SBF and MBF that control cell-cycle  
224 regulated genes (Breedon, 2003). The Gini indices computed for Swi6 and two of our Rad53  
225 replicates are 0.763, 0.2918, and 0.2982, respectively, calculated from Lorenz curves (Figure 3d).  
226 Rad53 has a higher coverage for many promoters while Swi6, as expected, shows substantially high  
227 coverage only for a limited number of promoters.

228  
229 Previous studies have found that under certain conditions, regions of the genome are promiscuously  
230 present in ChIP-Seq studies independent of the antibody used, enriching for sequences in and around  
231 gene bodies of highly expressed genes (Park et al., 2013; Teytelman et al., 2013). We therefore  
232 examined whether these gene regions were promiscuously present under our conditions. The ChIP-  
233 Seq data using anti- $\gamma$ H2A antibodies did not enrich for sequences at the TSS, whether or not the  
234 highly enriched sequences observed by Teytelman et al. and Park et al. were included in the analysis  
235 (Figure 3 – figure supplement 3). In addition, analysis of the Rad53 antibody ChIP with or without  
236 the highly enriched sequences observed by Teytelman et al. and Park et al. did not alter the pattern or  
237 frequency of Rad53 binding to TSSs (Figure 3 – figure supplement 4a and 4b). When we specifically  
238 examined at the pattern of Rad53 antibody enrichment at these 296 highly enriched genes we did not  
239 observe localization to TSSs, but enrichment to gene bodies as previously reported (Park et al., 2013;  
240 Teytelman et al., 2013) (Figure 3 figure supplement 4c). KEGG analysis of the genes enriched in the  
241 studies by Teytelman et al. and Park et al. show predominantly genes encoding snoRNAs and tRNAs,  
242 genes we did not find in the promoter binding for Rad53 (Figure 3 – figure supplement 5; see below).  
243 Finally, we did not see any gene enrichment when *RAD53* was deleted from the strain (Figure 3 –  
244 figure supplement 1a). Thus, we suggest that the Rad53 binding observed here is not the same as the  
245 promiscuous, non-specific enrichment of genome regions reported by Teytelman et al. and Park et al.  
246 Moreover, Rad53 binding to promoters is transcription factor dependent (see below).

247

## 248 **The relationship between Rad53 promoter binding and gene expression**

249

250 The relationship between Rad53 promoter recruitment was compared to gene expression from RNA-  
251 seq analysis using the same conditions. RNA-seq replicates from 4 strains (*WT*, *rad9Δ*, *rad53*<sup>K227A</sup>  
252 and *mrc1Δ*), each with 3 stages (G1, HU45 and HU90) were analyzed using rank data analysis  
253 (Figure 5a). The expression profiles in G1 are very similar among all strains. In HU, however, two  
254 groups are evident; *rad9Δ* is like WT since Rad9 has no role in the DRC checkpoint branch. In  
255 contrast, *rad53*<sup>K227A</sup> and *mrc1Δ* cluster together in both HU45 and HU90, consistent with Rad53 and  
256 Mrc1 functioning together in the response to HU stress.

257  
258 In the hierarchical clustering, cell cycle stage contributes more to similarities than the genotype  
259 (Figure 5a). Pair-wise comparison of G1 to HU45 in WT and *rad9Δ* cells shows that ~2300 genes  
260 exhibited significant expression changes (differentially expressed genes; DEGs; Figure 5b). The  
261 number of DEGs increases further to ~3000 when comparing G1 to HU90. In both *rad53<sup>K227A</sup>* and  
262 *mrc1Δ* mutants, ~2500 DEGs are detected from G1 to HU45, which increases to >3400 in G1 to  
263 HU90. The response to cell cycle stage is largely equally distributed between up and down regulation.  
264 A WT and *rad9Δ* comparison shows only 5 DEGs, demonstrating that Rad9 does not contribute to  
265 gene expression changes under HU stress.

266  
267 The overall heatmap signal of Rad53 upstream of TSSs is higher in the significant DEGs than in the  
268 insignificant DEGs, suggesting that Rad53 may play a role in control of gene expression (Figure 5c  
269 and Figure 5 – figure supplement 1). Gene co-expression analysis of the RNA-seq data yields ten co-  
270 expression clusters of DEGs in WT (G1 → HU45) (Figure 6a and Figure 6 – figure supplement 1).  
271 Specific, dynamic Rad53 binding at promoter regions occurs in most clusters (Figure 6b), with GO  
272 functions including cell cycle regulation, mating response, proteolysis, transport, oxidation-reduction  
273 process and organic acid metabolism (Figure 6a).

274  
275 Within the 435 Top DB overlapping genes (Figure 4b), 236 show significant expression changes.  
276 Plots of Rad53 binding changes against gene expression changes of these 236 genes show a positive  
277 correlation between Rad53 binding change and gene expression change (Figure 6c, left panel).  
278 Among this group, 51 out of 54 genes with decreased Rad53 signal are down-regulated in mRNA  
279 levels. Genes with increased Rad53 signals are partitioned between up-regulation and down-  
280 regulation (108 and 74, respectively). Further break down of the 236 gene group into co-expression  
281 clusters of the DEGs in WT (G1 → HU45) revealed that genes in clusters 1 and 7 exhibit the strongest  
282 correlation between Rad53 binding and gene expression changes (Figure 6c). Thus, specific subsets  
283 of DEGs in the shift from G1 → HU exhibit correlations between a change in gene expression and  
284 Rad53 promoter binding.

285

### 286 **Checkpoint mutants cause down-regulation of gene expression near** 287 **promiscuously active late origins**

288  
289 Upon inspection of Rad53 heatmaps around TSSs, we noticed that in several co-expression clusters  
290 from the DEGs in the HU45 (*mrc1Δ* vs WT) comparison (Figure 7a), down-regulated genes tend to  
291 have a strong Rad53 signal not only upstream of the TSS, but a broad signal within gene bodies  
292 (Figure 7b). This pattern is prominent in the *mrc1Δ* mutant at HU45 and further intensifies in HU90.  
293 The gene body localization is also found transiently in *rad53<sup>K227A</sup>* cells (Figure 7 – figure supplement  
294 1). Such a gene body signal is not as prevalent in the WT HU45 and HU90 samples. Since Rad53 is  
295 also recruited to active origins and moves with the replication fork, we suspected these gene body  
296 signals in the checkpoint mutants may be caused by the promiscuous activation of near-by origins  
297 that are normally inactive in WT, creating conflicts between DNA replication and gene transcription.  
298 The transient nature of the Rad53 localization at gene body in this group of genes in the *rad53<sup>K227A</sup>*  
299 mutant is also consistent with the transient signal pattern at these late origins (Figure 2f, bottom  
300 panel). Thus, we investigated the relationship between these genes and their closest replication  
301 origins.

302

303 The distance of replication origins to the nearest TSS, the relative orientation of the gene to the origin  
304 (head-on or co-directional) and the origin type (early, late or inactive; Figure 1b) was determined and  
305 correlated with the DEG clusters (Figure 7c). Overall, most of the down regulated genes in cluster 1  
306 of this group are situated very close to active origins (< 2 kb between origin center and TSS, light  
307 purple marks and <1 kb, dark purple marks). Interestingly, the pattern of origin to promoter distance  
308 marks largely mirrored the pattern of the Rad53 ChIP signal within the gene bodies (Figure 7b and 7c).  
309 This correlation pattern is not found in the WT ChIP heatmap. Within the DEG group, genes situated  
310 5 kb or more away from closest active origins are similarly distributed between up regulation and  
311 down regulation of gene expression (Figure 7d, left panels). However, for those genes that are closer  
312 to an active origin, the bias to be down regulated gene increases. For those that gene situated less  
313 than 1 kb away from active origins, more than 80% are down-regulated genes.

314  
315 The DEGs in HU45 (*mrc1Δ* vs *WT*) that are more than 5 kb away from active origins are also  
316 similarly distributed between up and down regulation (Figure 7d, middle panels). More down  
317 regulated genes are found when the nearby origins are active. The bias is even stronger for genes that  
318 are close to late origins, which become active in HU when Mrc1 is absent. Because late origins and  
319 intermediate early origins are more active in the *mrc1Δ* mutant, it is possible that nearby gene  
320 expression is negatively affected by active DNA synthesis. Furthermore, the bias toward the down  
321 regulation is even stronger (>80%) when the nearby origin is in a head-on orientation towards the  
322 gene (Figure 7d, right panels). Similarly, a bias exists toward down regulation of DEGs from HU45  
323 (*rad53<sup>K227A</sup>* vs *WT*) that are close to active origins (Figure 7 – figure supplement 1). The tendency to  
324 find a high Rad53 signal at gene bodies in the *mrc1Δ* and *rad53<sup>K227A</sup>* mutants also occurred in the  
325 down-regulated DEGs in *mrc1Δ* (G1→HU45) (Figure 5 – figure supplement 1c), likely caused by  
326 the same proximal origins. Thus, the untimely activation of replication origins in the checkpoint  
327 mutants affects gene expression and Rad53 binding to gene bodies.

## 328 329 **Rad53 binding changes coincide with the changes in gene expression for targets of** 330 **cell cycle regulators SBF, MBF and mating response regulator Ste12**

331  
332 The DEGs in WT (G1→HU45) were associated with co-expression clusters that showed a strong  
333 correlation between Rad53 binding and gene expression (Figure 6c, clusters 1 and 7). They contain  
334 genes that encode targets of SBF and MBF, key transcription factor complexes comprised of a shared  
335 regulatory subunit, Swi6 and the DNA-binding subunits Swi4 and Mbp1, respectively (Breedon,  
336 2003). Their target genes include multiple G1- and S-phase cyclin genes, such as *PCL1*, *CLN1*, *CLN2*,  
337 *CLB5*, *CLB6*. Evidence suggests that SBF and MBF are directly regulated by Rad53 kinase (Oliveira  
338 et al., 2012; Sidorova and Breedon, 2003; Travesa et al., 2012) and Rad53 may regulate expression of  
339 targets of Msn4, Swi6, Swi4, and Mbp1 through Dun1-independent mechanisms (Jaehnig et al.,  
340 2013). Thus, we analyzed the annotated targets of these transcription factors compiled in the  
341 *Saccharomyces* Genome Database (SGD; <https://www.yeastgenome.org>). Among the 81 genes that  
342 are candidate targets for both Swi4 and Swi6, 36 genes were found in the 236 significant DEGs in the  
343 Top DB overlap (Figures 4b and 6c) with an enrichment of 12.91. Scatter plot comparisons of Rad53  
344 binding and gene expression changes of these 36 genes show a clear positive correlation (Figure 8a,  
345 SBF top panel). Combining the data from the checkpoint mutants (Figure 8a, SBF bottom panel and  
346 Figure 8 – figure supplement 1a) show that most of these genes have similar levels of differential  
347 expression in the *rad9Δ* mutant compared with WT from G1 to HU45, whereas in the *mrc1Δ* and  
348 *rad53<sup>K227A</sup>* mutants exhibit different level of changes. Similar plot patterns were found with 26 out of



349 65 MBP targets with an enrichment of 11.62 (Figure 8a and Figure 8 – figure supplement 1b),  
350 including overlap between the targets of SBF and MBF (19 genes). We also found enrichment for  
351 targets of transcription factor Msn4 and patterns of correlation (Figure 8a and Figure 8 – figure  
352 supplement 1d, Msn4 panels), including 12 out of 22 Msn4 targets that are also SBF targets.

353  
354 Many of the genes with decreased Rad53 binding at the promoters are mating response genes  
355 (Figures 4b and c). Therefore, the targets of Ste12, a key transcription factor activated by MAPK  
356 signaling to activate genes involved in mating or pseudohyphal/invasive growth pathways were  
357 investigated. Of 183 potential targets of Ste12 annotated in SGD, 34 are in the 236 significant DEGs  
358 in the Top DB overlap (Figures 6c and 8a). All the Ste12 targets that have decreased Rad53 binding  
359 are down regulated as cells entered S-phase. Moreover, 20 out of the 34 Ste12 targets in the Top DB  
360 group show increased Rad53 binding in HU and 11 of these 20 genes are also targets of SBF. Thus,  
361 regulation by SBF appears to be responsible for the correlation between increased Rad53 binding at  
362 the promoter and up-regulation of these target genes.

### 363 364 **SBF plays a major role in the localization of Rad53 to the promoters of its target** 365 **genes under replication stress**

366  
367 To determine the contribution of various transcription regulators in recruitment of Rad53 to gene  
368 promoters, Rad53 ChIP-seq analysis in *WT*, *ixr1Δ*, *swi4Δ* and *swi6Δ* mutants was performed. In the  
369 scatter plot of the Rad53 signal upstream of TSSs in G1 versus HU45 from the *WT* sample, SBF  
370 targets in the Top DB (Figure 8b, orange/red diamonds) showed significant deviation from the global  
371 trend (blue dots). In *swi4Δ* and *swi6Δ* mutants, the signal for all of these SBF targets collapses  
372 towards the global trend (purple and light olive dots, *swi6Δ* and *swi4Δ*, respectively), suggesting that  
373 Rad53 signal changes at these genes depends on SBF. In the *ixr1Δ* mutant (green dots), the majority  
374 of these SBF targets remain deviated from the global trend in the scatter plot, except for the *RNR1*  
375 gene, indicated in the close-up plots (Figure 8b, lower panels), whose position collapsed in all three  
376 mutants. Rad53 binding to the *RNR1* promoter is reduced in both SBF mutants, consistent with *RNR1*  
377 being a target of SBF and MBF ((Bruin et al., 2006)). Rad53 binding is completely eliminated from  
378 the *TOS6* (target of SBF 6) promoter while for *PCL1* and *YOX1*, both targets of SBF, Rad53 binding  
379 does not increase in HU. Interestingly, at the promoter of *RNR3*, the paralog of *RNR1*, Rad53 binding  
380 in the SBF mutants is low, even though *RNR3* may not be a SBF or MBF target. On the other hand,  
381 *ixr1Δ* reduces Rad53 binding to *RNR1* in HU but has no effect on Rad53 recruitment at the *RNR3*  
382 promoter (Figure 8c).

### 383 384 **Discussion**

385  
386 Following hydroxyurea induced replication stress, Rad53 was recruited to active origins of DNA  
387 replication and to DNA replication forks in a checkpoint independent manner since *mrc1Δ* and  
388 *rad53<sup>K227A</sup>* mutants had little effect on binding. Rad53 is targeted to replisomes by the helicase  
389 subunits Cdc45 and Mcm2 where it is activated by Mec1 kinase dependent on Mrc1 at the fork, and  
390 stabilizes the replisome (Can et al., 2018; Cobb et al., 2005; Lou et al., 2008; McClure and Diffley,  
391 2021; Szyjka et al., 2008). Maintenance of Rad53 at the replication forks requires Rad53 kinase  
392 activity but not DRC checkpoint signaling. Since Rad53 kinase can auto-activate itself (Gilbert et al.,  
393 2001; Lanz et al., 2019; Pardo et al., 2017; Saldivar et al., 2017), we suggest that either auto-

394 activation or binding to a phosphorylated replisome protein is required for the continued presence of  
395 Rad53 at replication forks.

396  
397 Checkpoint signaling also prevents replication initiation in late replicating regions of the genome  
398 (Hamperl and Cimprich, 2016). However, in the checkpoint mutants, these late origins become active  
399 and Rad53 was recruited to the body of origin proximal genes. Concomitantly, gene expression of  
400 these genes was reduced, perhaps mediated by recruitment of Rad53. We suggest that the normal  
401 temporal order of replication of the genome throughout S-phase has evolved to prevent conflicts  
402 between replication and transcription, which is particularly important in a gene dense genome such as  
403 *S. cerevisiae*. It is known that late replicating genes are tethered to the nuclear pore complexes in the  
404 nuclear periphery and checkpoint signaling, including Rad53 kinase, is required for preventing  
405 topological impediments for replication fork progression (Bermejo et al., 2011; Hamperl and  
406 Cimprich, 2016). Moreover, during normal replication, Mec1 may locally activate Rad53 to deal with  
407 difficult to replicate regions or regions of replication-transcription conflict without triggering full  
408 blown checkpoint activation (Bastos de Oliveira et al., 2015). Rad53 kinase inhibits Mrc1 stimulation  
409 of the CMG helicase (McClure and Diffley, 2021), consistent with our observation that replication  
410 fork progression is limited in the absence of Mrc1 and that replication forks cannot be rescued after  
411 DNA damage in *rad53<sup>K227A</sup>* cells (Forey et al., 2020).

412  
413 Unexpectedly we also found Rad53 constitutively bound to > 20% of the gene promoters in the yeast  
414 genome, independent of Mrc1 and Rad53 kinase activities. The genes encode proteins with diverse  
415 activities, including various aspects of cell cycle, metabolism, protein modification, ion transport, cell  
416 wall organization and cell growth. The levels of Rad53 binding to most of these genes did not change  
417 during the time course in HU, whereas Rad53 binding increased at promoters for genes such as *RNR1*,  
418 *RNR3* and *TOS6*. In contrast, Rad53 levels decreased on the promoters of genes involved in response  
419 to mating pheromone as cells exited from  $\alpha$ -factor induced G1 arrest into the cell division cycle. The  
420 prevalent and dynamic changes in Rad53 promoter-bound levels did not necessarily depend on  
421 checkpoint signaling at genes like *PCL1*, but in some cases such as *RNR1*, the increase in Rad53  
422 levels was reduced in checkpoint mutants.

423  
424 The conditions employed in this study, cell cycle entry in the presence of hydroxyurea, may  
425 determine the nature of the genes that display dynamic binding of Rad53 to gene promoters. It is  
426 known that Rad53 phosphorylates transcription factors such as the SBF and MBF subunit Swi6 and  
427 the MBF co-repressor Nrm1 (Sidorova and Breeden, 2003; Travesa et al., 2012) and that Ixr1 controls  
428 transcription of *RNR1* (Tsaponina et al., 2011). Removal of Swi4, Swi6 or Ixr1 reduced, and in some  
429 cases eliminated Rad53 binding to promoters of genes controlled by these transcription factors.  
430 Rad53 bound to the Nrm1 promoter, suggesting an additional regulation of cell cycle-dependent  
431 transcription control by Rad53. Rad53 also bound to promoters of genes encoding histones H3 and  
432 H4, suggesting that in addition to its known role in histone degradation (Gunjan and Verreault, 2003)  
433 Rad53 controls histone gene expression. This is consistent with previous findings that Rad53 targets  
434 Yta7 (Smolka et al., 2006), which interacts with FACT to regulate histone gene expression and  
435 inhibits Spt21<sup>NPAT</sup>-regulated histone genes expression (Bruhn et al., 2020; Gradolatto et al., 2008). In  
436 the absence of Rad53 protein, histone levels become elevated, causing global effects on gene  
437 expression (Bruhn et al., 2020; Tsaponina et al., 2011).

438

439 Our data is consistent with the possibility that the Rad53 kinase contributes to the transcriptional  
440 regulation as a structural component, as previously suggested for several MAP kinases (Alepuz et al.,  
441 2001; Kim et al., 2008; Sanz et al., 2018). Like the stress induced kinase Hog1, Rad53 binding to  
442 promoters may be dynamic in other stress conditions, which is under investigation. A major  
443 unanswered question is how does Rad53 bind to so many diverse promoter sites.  
444

## 445 **Acknowledgements**

446 This research was supported by NIH grants R01GM45436 and R01LM012736 and a gift from the  
447 Goldring Family Foundation. The Cold Spring Harbor Laboratory Cancer Center supported core  
448 research resources (P30-CA045508). RKK was supported by Uehara Memorial Foundation  
449 Postdoctoral Fellowship.  
450

## 451 **Materials and methods**

### 452 **Yeast strains and methods**

453 Yeast strains generated in this study were derived from W303-1a (MATa ade2-1 can1-100 his3-11,15  
454 leu2-3,112 trp1-1 ura3-1) and are described in Supplemental Table 1. All the yeast strains used for  
455 the whole-genome DNA replication profile analyses have a copy of the BrdU-Inc cassette inserted  
456 into the URA3 locus ((Viggiani and Aparicio, 2006)). For G1 arrest of *bar1*Δ strains, exponentially  
457 growing yeast cells (~10<sup>7</sup> cell/mL) in YPD were synchronized in G1 with 25 ng/mL of α-factor for  
458 150 min at 30°C. For G1 arrest of *BAR1* strains, exponentially growing cells were grown in normal  
459 YPD, then transferred into YPD (pH3.9), grown to ~10<sup>7</sup> cell/mL, and then synchronized in G1 with  
460 three doses of α-factor at 2 μg/mL at 0-, 50-, and 100-min time point at 30°C. Cells were collected at  
461 150 min for release. To release from G1 arrest, cells were collected by filtration and promptly  
462 washed twice on the filter using one culture volume of H<sub>2</sub>O and then resuspended into YPD medium  
463 containing 0.2 mg/mL pronase E (Sigma).  
464

### 465 **Protein sample preparation and immunoblot analysis**

466 TCA extraction of yeast proteins was as described previously ((Sheu et al., 2014)). For immunoblot  
467 analysis, protein samples were fractionated by SDS-PAGE and transferred to a nitrocellulose  
468 membrane. Immunoblot analyses for Orc6 (SB49), Rad53 (ab104232, Abcam), γ-H2A (ab15083,  
469 Abcam) and Sml1 (AS10 847, Agrisera) were performed as described ((Sheu et al., 2016, 2014)).  
470

### 471 **Isolation and preparation of DNA for whole-genome replication profile analysis**

472 Modified protocol based on previously described ((Sheu et al., 2016, 2014)). Briefly, yeast cells  
473 were synchronized in G1 with α-factor and released into medium containing 0.2 mg/mL pronase E,  
474 0.5 mM 5-ethynyl-2'-deoxyuridine (EdU) with or without addition of 200 mM HU as indicated in the  
475 main text. At the indicated time point, cells were collected for preparation of genomic DNA. The  
476 genomic DNA were fragmented, biotinylated, and then purified. Libraries for Illumina sequencing  
477 were constructed using TruSeq ChIP Library Preparation Kit (Illumina). Libraries were pooled and  
478 submitted for 50 bp paired-end sequencing.  
479

### 480 **Sample preparation for Chromatin immunoprecipitation coupled to deep sequencing (ChIP-seq)**

481 Chromatin immunoprecipitation (ChIP) was performed as described ((Behrouzi et al., 2016)) with  
482 modification. About 10<sup>9</sup> synchronized yeast cells were fixed with 1% formaldehyde for 15 min at  
483 room temperature (RT), then quenched with 130 mM glycine for 5 min at RT, harvested by  
484

485 centrifugation, washed twice with TBS (50 mM Tris.HCl pH 7.6, 150 mM NaCl), and flash frozen.  
486 Cell pellets were resuspended in 600  $\mu$ l lysis buffer (50 mM HEPES-KOH pH 7.5, 150 mM NaCl, 1  
487 mM EDTA, 1% Triton X-100, 0.1% Na-Deoxycholate, 0.1% SDS, 1 mM PMSF, protease inhibitor  
488 tablet (Roche)), and disrupted by bead beating using multi-tube vortex (Multi-Tube Vortexer, Baxter  
489 Scientific Products) for 12-15 cycles of 30 seconds vortex at maximum intensity. Cell extracts were  
490 collected and sonicated using Bioruptor (UCD-200, Diagenode) for 38 cycles of pulse for 30  
491 seconds "ON", 30 seconds "OFF" at amplitude setting High (H). The extract was centrifuged for 5  
492 min at 14,000 rpm. The soluble chromatin was used for IP.

493  
494 Antibodies against Cdc45 (CS1485, this lab (Sheu and Stillman, 2006)), Rad53 (ab104232, Abcam),  
495  $\gamma$ -H2A (ab15083, Abcam) was preincubated with washed Dynabeads Protein A/G (Invitrogen, 1002D  
496 and 1004D). For each immunoprecipitation, 80  $\mu$ l antibody-coupled beads was added to soluble  
497 chromatin. Samples were incubated overnight at 4°C with rotation, after which the beads were  
498 collected on magnetic stands, and washed 3 times with 1 ml lysis buffer and once with 1 ml TE, and  
499 eluted with 250  $\mu$ l preheated buffer (50 mM Tris.HCl pH 8.0, 10 mM EDTA, 1% SDS) at 65°C for  
500 15 min. Immunoprecipitated samples were incubated overnight at 65°C to reverse crosslink, and  
501 treated with 50  $\mu$ g RNase A at 37°C for 1 hr. 5  $\mu$ l proteinase K (Roche) was added and incubation  
502 was continued at 55°C for 1 hr. Samples were purified using MinElute PCR purification kit (Qiagen).  
503 Libraries for Illumina sequencing were constructed using TruSeq ChIP Library Preparation Kit  
504 (Illumina, IP-202-1012 and IP-202-1024).

505  
506 The duplicate Rad53 ChIP-Seq data was compared to published ChIP-Seq data for Swi6 (Park et al.,  
507 2013) ([SRX360900](https://www.ncbi.nlm.nih.gov/sra/SRX360900): GSM1241092: swi6\_DMSO\_illumina; *Saccharomyces cerevisiae*; ChIP-Seq),  
508 creating Gini indexes from calculated Lorenz curves (Andri et mult. al. S (2021). *DescTools: Tools*  
509 *for Descriptive Statistics*. R package version 0.99.41, <https://cran.r-project.org/package=DescTools>).

510  
511 **Sample preparation for RNA seq**  
512 About  $2-3 \times 10^8$  flash-frozen yeast cells were resuspended in Trizol (cell pellet: Trizol = 1:10) and  
513 vortex for 15 sec and incubate 25°C for 5 min. Add 200  $\mu$ l chloroform per 1 ml of Trizol-cell  
514 suspension, vortex 15 sec, then incubate at room temp for 5 min and centrifuge to recover the  
515 aqueous layer. The RNA in the aqueous layer were further purified and concentrated using PureLink  
516 Column (Invitrogen, 12183018A). The RNA was eluted in 50  $\mu$ l and store at 20°C if not used  
517 immediately. Store at -80°C for long term. Paired-end RNA-seq libraries were prepared using  
518 TruSeq stranded mRNA library preparation kit (Illumina, 20020594).

519  
520 **Generation of coverage tracks using the Galaxy platform**  
521 For visualization of read coverage in the Integrated Genome Browser ((Freese et al., 2016)), the  
522 coverage tracks were generated using the Galaxy platform maintained by the Bioinformatics Shared  
523 Resource (BSR) of Cold Spring Harbor Lab. The paired-end reads from each library were trimmed to  
524 31 bases and mapped to *sacCer3* genome using Bowtie ((Langmead, 2010)). The coverage track of  
525 mapped reads was then generated using bamCoverage ((Ramírez et al., 2014)) with normalization to  
526 1x genome.

527  
528  
529 **Definition of the origin-types**



530 Based on the BamCoverage output for EdU signal in *WT*, *rad53<sup>K227A</sup>* and *mrc1Δ*, we categorized 829  
531 origins listed in the oriDB database ((Siow et al., 2012)). We define the early origins as the one whose  
532 signal at the first time point is larger than 2. The late origins are extracted from the rest of the origins if the  
533 average signal value at the later time point is larger than 2 in *rad53<sup>K227A</sup>* and *mrc1Δ* mutants. Among the  
534 829 entries in oriDB, we defined 521 as active origins (with EdU signal in *WT* or checkpoint mutants  
535 *rad53<sup>K227A</sup>* and *mrc1Δ*), in which 256 was categorized as early origins (with EdU signal in *WT*) and  
536 265 as late origins (with signal in checkpoint mutants but not in *WT*). The remaining 308 entries do  
537 not have significant signal under our condition and were deemed inactive origins.  
538

### 539 **Computational analysis of sequence data**

540 The sequenced reads were trimmed by cutadapt with an option of “nextseq-trim”, then aligned by  
541 STAR ((Dobin et al., 2013)) in a paired-end mode to the sacCer3 genome masked at repetitive  
542 regions. The gene structure is referred from SGD reference genome annotation R64.1.1 as of Oct.  
543 2018. For RNA-seq quantification analysis, the total counts of aligned reads were computed for each  
544 gene by applying “GeneCounts” mode. For ChIP-seq quantification analysis, the reads were mapped  
545 using the same pipeline. Additionally, peak calling was done by MACS2 in a narrow peak mode.  
546

### 547 **Gene expression analysis**

548 Differentially expressed genes (DEGs) and their p-values were computed for each pair of the cases by  
549 nbinomWaldTest after size factor normalization using DESeq2 ((Love et al., 2014)). Using the list of  
550 DEGs, GO and KEGG enrichment analyses were performed via Pathview library. ClusterProfiler  
551 was applied to visualize fold changes of DEGs in each KEGG pathway. Co-expression analysis of  
552 significant DEGs was further performed base on co-expression network constructed in CoCoCoNet  
553 ((Lee et al., 2020)). CoCoCoNet has established the co-expression matrix of Spearman’s correlation  
554 ranking based on 2,690 samples downloaded from SRA database. We carried out clustering for the  
555 correlation matrix downloaded from CoCoCoNet (yeast\_metaAggnet) by dynamicTreeCut in R (or  
556 hierarchical clustering) to obtain at most 10 clusters. The enrichment analysis for the gene set of each  
557 cluster was performed in the same way with RNA-seq analysis.  
558

### 559 **ChIP-seq signal normalization**

560 For ChIP-seq signal normalization, two different methods were applied to different types of analysis.  
561 For ChIP-seq residual analysis, we used simple normalization. In this process, each case sample is  
562 compared with the corresponding control sample of DNA input to compute log<sub>2</sub> fold changes within  
563 each 25 bp window reciprocally scaled by multiplying the total read counts of another sample. Then,  
564 the average of fold changes is computed for each duplicate. For ChIP-seq heatmap analysis, we  
565 employed the origin-aware normalization to account for the higher background around origin region  
566 as a result of DNA replication. In the origin-aware normalization, the same computation used in  
567 simple normalization, or log<sub>2</sub> fold change with scaling by the total read count, is independently  
568 applied for the region proximal to the origins and others. For the heatmap presented in this paper, the  
569 origin-proximal region is defined as the region within 5,000 bp upstream and downstream.  
570

### 571 **Heatmap analyses at origins and TSS**

572 After the average fold change computation and normalization from ChIP-seq signals, the signal  
573 strength is visualized around the target regions such as TSSs and replication origins are extracted  
574 using normalizeToMatrix function in EnrichedHeatmap (window size is 25 bp and average mode is  
575 w0). We ordered heatmaps to examine a different signal enrichment pattern for the characteristics of



576 each origin or gene. For the heatmap row of each origin is ordered by the assigned replication timing  
577 for ChIP-seq signals around replication origins. The replication time for the origins are annotated  
578 with the replication timing data published previously ((Yabuki et al., 2002)). From the estimated  
579 replication time for each 1,000 bp window, we extracted the closest window from the center of each  
580 replication origin and assigned it as the representative replication timing if their distance is no more  
581 than 5,000 bp. Early and late origins groups are categorized according to the definition of the origin-  
582 types using the replication profile data from this study. The final set of the replication origins used in  
583 the heatmap analysis are obtained after filtering out the replication origins overlapped with any of 238  
584 hyper-ChIPable regions defined in the previous study ((Teytelman et al., 2013)). In total, 167 early  
585 and 231 late origins pass this filter and are used in the heatmaps analysis in this study. For heatmaps  
586 of the ChIP-seq signals around TSS, we ordered genes based on RNA-seq fold changes for all DEGs  
587 or per co-expression cluster of DEGs based on gene co-expression network constructed in  
588 CoCoCoNet ((Lee et al., 2020)).

589

### 590 **ChIP-seq residual analysis**

591 To detect the time-dependent increase or decrease of Rad53 binding signals, we first focused on the  
592 500 bp window upstream from each TSS and computed the sum of the fold change signals estimated  
593 for each 25-bp window scaled by the window size as an activity of Rad53 binding for each gene. The  
594 overall activity scores are varied for each time point probably because of the different Rad53 protein  
595 level or other batch-specific reasons. To adjust such sample specific differences for a fair comparison,  
596 a linear regression is applied for the activity scores of all genes between G1 and other time points  
597 HU45 and HU90 using `lm` function in R. Then we selected top genes showing the deviated signals  
598 from the overall tendency according to the absolute residual values between the actual and predicted  
599 values, excluding the genes with signal value lower than -0.075 after scaling the maximal signal to 1.  
600 Top 1,000 genes with the highest absolute residual values were selected from 2 sets of experiments.  
601 The common 435 genes among the duplicates were selected for further analysis.

602

### 603 **Data Availability**

604 All data supporting this work are available at public data sites. XXXX Source data are provide with  
605 this paper. XXXXURL.

606

### 607 **Code Availability**

608 R scripts for the co-expression analyses including clustering and enrichment analysis are available at  
609 [https://github.com/carushi/yeast\\_coexp\\_analysis](https://github.com/carushi/yeast_coexp_analysis).

610

611

### 612 **Figure legends**

613

#### 614 **Figure 1. DNA synthesis under stress caused by depletion of dNTP pool and during recovery** 615 **from the stress.**

616 **a**, Yeast cells were synchronized in G1-phase and released into YPD containing 0.2 M HU for 90 min.  
617 (Top panel) Replication profiles of Chromosome IV for the wild type (WT), *rad53*<sup>K227A</sup> and *mrc1*Δ  
618 mutants. (Bottom panel) Replication profiles of wild type (WT), *rad9*Δ and *rad53*<sup>K227A</sup> mutants. Red  
619 arrows point out some late origins. Ori-DB track indicate positions of replication origins annotated in  
620 OriDB (Siow et al., 2012). **b**, Scatter plot of EdU signals from early (E), late (L) and inactive (I)  
621 origins in WT *rad53*<sup>K227A</sup> and *mrc1*Δ mutants. **c**, Scheme for accessing DNA synthesis during

622 recovery from HU stress. **d**, Cells that had progressed from G1 into S-phase in HU for 45 min. were  
623 released from the HU block and DNA synthesis labeled with EdU during an additional 25 min  
624 (HU→S25) or were continued in HU for another 45 min. and labeled with EdU (HU→HU45).  
625 Replication profiles of Chromosome III is shown as an example.

626  
627 **Figure 1 – figure supplement 1. DNA synthesis under stress caused by depletion of dNTP pool**  
628 Yeast cells were synchronized in G1 phase and released into YPD containing 0.2 M HU for 45 and 90  
629 min (HU45 and HU90, respectively). **a**, Replication profiles of Chromosome IV for the wild type  
630 (WT) and *mrc1Δ* mutants and for the WT and *rad53<sup>K227A</sup>* mutants. **b**, Replication profiles of  
631 Chromosome III of WT, *rad9Δ* and *rad53<sup>K227A</sup>* mutants at HU90. Red arrows point out some late  
632 origins. Location of some heterochromatin regions are also indicated (black text and arrows).

633  
634 **Figure 2. Replisome status and checkpoint signaling at replication origins under replication**  
635 **stress**  
636 Cells were synchronized in G1-phase and released into YPD containing 0.2 M HU for 45 and 90 min  
637 (HU45 and HU90, respectively). WT, *rad53<sup>K227A</sup>* and *mrc1Δ* mutant cells at stages of G1, HU45 and  
638 HU90 were collected and processed for ChIP-seq analysis for distribution of Cdc45,  $\gamma$ -H2A and  
639 Rad53 at genome locations. **a, c and e**, Coverage tracks of ChIP-seq signals generated from mapped  
640 reads using BamCoverage with normalization of 1X genome size. **b, d and f**, Heatmaps of ChIP-seq  
641 signals across 30 kb interval centered on active origins. Early origins (top panels) and late origins  
642 (bottom panels) are ordered according to the associated replication timing data reported in a previous  
643 study ((Yabuki et al., 2002)). **a**, Distribution of Cdc45 ChIP-seq signal on chromosome III. **b**,  
644 Heatmaps of Cdc45 ChIP-seq signal around active origins. **c**,  $\gamma$ -H2A ChIP-seq signal on chromosome  
645 III. **d**, Heatmaps of  $\gamma$ -H2A ChIP-seq signal around active origins. **e**, Rad53 ChIP-seq signal on  
646 chromosome III. **f**, Heatmaps of Rad53 ChIP-seq signal around active origins.

647  
648 **Figure 2 – figure supplement 1. Heatmaps of ChIP-seq signal across 30 kb centered on all**  
649 **active origins**  
650 Cells were synchronized in G1 phase and released into YPD containing 0.2 M HU for 45 and 90 min  
651 (HU45 and HU90, respectively). WT, *rad53<sup>K227A</sup>* and *mrc1Δ* mutant cells at stages of G1, HU45 and  
652 HU90 were collected and processed for ChIP-seq analysis. **a, b, and c**, Heatmaps of ChIP-seq signal  
653 of Cdc45,  $\gamma$ -H2A and Rad53, respectively, across 30 kb centered on all active origins as defined in  
654 this study (see **Definition of the origin-types in methods section**). Origins are ordered according to  
655 the associated replication timing data reported in previous study (Yabuki et al., 2002).

656  
657 **Figure 3. Rad53 is recruited to TSS and the binding changes with the cell cycle stage**  
658 **a**, Distribution of Rad53 ChIP-seq signal near *RNR1*, *PCL1* and *TOS6* genes in WT, *rad53<sup>K227A</sup>* and  
659 *mrc1Δ* mutant cells at stages of G1, HU45 and HU90. **b**, Rad53 ChIP-seq profiles in WT, *sml1Δ*,  
660 *rad53Δsml1Δ*, and *mec1Δsml1Δ* near *RNR1* gene. Asynchronous yeast cultures were processed for  
661 ChIP-seq analysis for distribution of Rad53. Tracks from WT G1, HU45 and HU90 are also included  
662 for reference. **c**, Heatmaps and average signals of Rad53 ChIP-seq signal across 2 kb interval  
663 centered on transcription start sites (TSS) for WT, *rad53<sup>K227A</sup>* and *mrc1Δ* mutant cells at stages of G1,  
664 HU45 and HU90.

665  
666 **Figure 3 – figure supplement 1. Recruitment of Rad53 to upstream TSS depends on the**  
667 **presence of Rad53**

668 **a.** Rad53 ChIP-seq profiles in *WT*, *sml1Δ*, *rad53Δsml1Δ*, and *mec1Δ sml1Δ* for chromosome III.  
669 Asynchronous yeast cultures were processed for ChIP-seq analysis for distribution of Rad53. The  
670 results from two independent experiments are shown. Experiment 1 compares only *sml1Δ*,  
671 *rad53Δsml1Δ*. Experiment 2 is the same shown in Figure 3b. Tracks from *WT* G1, HU45 and HU90  
672 are also included for reference. **b,** Pie charts showing the distribution of Rad53 ChIP-seq peaks in  
673 relation to genes.

674  
675 **Figure 3 – figure supplement 2. Relative level of Rad53 protein changes in cells**  
676 **a,** Immunoblots monitoring protein status for Rad53, Orc6,  $\gamma$ -H2A and Sml1 during checkpoint  
677 activation from G1 to HU45 and HU90. **b,** Comparison of Rad53 protein level in G1 extracts from  
678 *WT*, *rad53<sup>K227A</sup>*, *mrc1Δ* and *rad9Δ* cells. Blots for Orc6,  $\gamma$ -H2A and Sml1 are included for reference.  
679 **c,** Comparison of Rad53 protein level in HU90 extracts from *WT*, *rad53<sup>K227A</sup>*, *mrc1Δ* and *rad9Δ* cells.  
680 14 % SDS-PAGE was used for the Rad53 blot to allow collapsing of all phosphorylated forms into a  
681 single band. Two-fold dilutions of the samples are loaded.

682  
683 **Figure 3 – figure supplement 3. Comparison of  $\gamma$ H2A enrichment with and without sequences**  
684 **enriched promiscuously in previous studies.** Heatmaps surrounding the TSS (plus and minus 1000  
685 bp) using ChIP-Seq data with antibodies against  $\gamma$ H2A. Panel a shows the complete data set and  
686 panel b shows the data set following removal of the so-called hyper-ChIPable regions observed  
687 previously (Park et al., 2013; Teytelman et al., 2013).

688  
689 **Figure 3 – figure supplement 4. Comparison of Rad53 enrichment with and without sequences**  
690 **enriched promiscuously in previous studies.** Heatmaps surrounding TSS (plus and minus 1000 bp)  
691 using ChIP-Seq data with antibodies against Rad53. Panel a shows the complete data set, panel b  
692 shows the data set following removal of the hyper-ChIPable regions (Teytelman et al., 2013) and  
693 panel c shows the signal data surrounding the TSS for genes only at the so-called hyper-ChIPable  
694 regions observed by Teytelman et al. and Park et al. The pattern of localization is both upstream and  
695 downstream of the TSSs, unlike that found for Rad53 ChIP-Seq surrounding TSSs.

696  
697 **Figure 3 – figure supplement 5. KEGG enrichment for the hyperChIPable regions.** The non-  
698 specific, promiscuous hyper-ChIPable regions observed by Teytelman et al. 2013 and Park et al.  
699 2013 were re-analyzed by KEGG analysis, showing mostly tRNA and snoRNA genes. 296 sequences  
700 were analyzed, much smaller than the regions enriched at TSSs using Rad53 antibodies.

701  
702 **Figure 4. Identification of genes with Rad53 binding changes at the promoters**  
703 **a.** Examples of coverage tracks for selected genes show Rad53 signal changes at the indicated  
704 promoters from G1 to HU. **(b)** Scatter plots compare the signals in G1 and HU45 at 500 bp intervals  
705 upstream of TSS for all genes in *WT*. Orange dots indicated the 1000 genes with highest binding  
706 changes (Top 1000 DB) and satisfying the filter of minimal signal of -0.075 (Maximal = 1). The two  
707 plots represent *WT* data sets from two separate experiments (see text). **(c)** Binding changes for 435  
708 genes that are in both sets of Top 1000 DB (435 Top DB overlap).

709  
710 **Figure 5. Gene expression changes in *WT* and checkpoint mutants under stress and the**  
711 **tendency of higher Rad53 binding at promoter of genes with significant differential expression**  
712 **a.** Rank data analysis of RNA-seq samples. *WT*, *rad9Δ*, *rad53<sup>K227A</sup>* and *mrc1Δ* cells were  
713 synchronized in G1-phase and released into YPD containing 0.2 M HU for 45 and 90 min (HU45 and

714 HU90, respectively). Cells at stages of G1, HU45 and HU90 were collected and processed for RNA-  
715 seq analysis. **(b)** Bar graph summarizing the number of genes that show statistically significant  
716 differential expression (DEGs) in pair-wise comparison as indicated to the right. Blue bars, down-  
717 regulated DEGs. Orange bars, up-regulated DEGs. **(c)** Average Rad53 ChIP-seq signal across 2 kb  
718 interval centered on at TSS for statistically significant (red) and insignificant (cyan) DEGs.

719  
720 **Figure 5 – figure supplement 1. Average Rad53 ChIP-seq signal and heatmaps of signal across**  
721 **2 kb interval centered on TSS for various groups of time-dependent differentially expressed**  
722 **genes (DEGs)**

723 **a**, Rad53 ChIP-seq signal in *WT*, *rad53<sup>K227A</sup>* and *mrc1Δ* mutant cells at stages G1, HU45 and HU90  
724 for DEGs in *WT*(G1→HU45) and in *WT*(G1→HU90). **b and c**, Rad53 ChIP-seq signal DEGs in  
725 *rad53<sup>K227A</sup>*(G1→HU45) and *mrc1Δ*(G1→HU45), respectively. Genes in each group are arranged  
726 according to the differential expression level from up to down. Average ChIP-seq signal for  
727 significant (red) and for insignificant (cyan) DEGs are plotted on top of the heatmap.

728  
729 **Figure 6. Correlation between differential binding of Rad53 at promoter and differential gene**  
730 **expression**

731 **a**, Co-expression cluster matrix for significant DEGs in *WT* (G1→HU45). Cluster (C): color codes  
732 for DEG clusters. Gene(G): level of differential expression. **b**, Heatmaps of Rad53 ChIP-seq signal  
733 across 2 kb interval centered on TSS for DEG clusters in **a**. Genes within each cluster are ordered by  
734 the level of expression changes from up to down. **c**, Scatter plots of binding changes against  
735 expression changes for the 236 significant DEGs in the 435 Top DB overlap group (top, left) and  
736 subgroups in clusters 1, 2, 4 and 7.

737  
738 **Figure 6 – figure supplement 1. Rad53 ChIP-seq signal and heatmaps of signal across 2 kb**  
739 **interval centered on TSS for co-expression clusters in significant DEG in *WT* (G1→HU45).**  
740 Genes in each group are arranged according to the log<sub>2</sub> based differential expression level from up to  
741 down. The three left most heatmap columns for *WT* samples are identical as in Figure 6b.

742  
743 **Figure 7. Origin-proximal DEGs are biased towards down-regulation in the *mrc1Δ* mutant.**  
744 **a**, Co-expression cluster matrix for significant DEGs in HU45 (*mrc1Δ* vs *WT*). Cluster (C): color  
745 codes for DEG clusters. Gene(G): level of differential expression. **b**, Heatmaps of Rad53 ChIP-seq  
746 signal across 2 kb interval centered on TSS for DEG clusters in **a**. ChIP-seq signal in *WT*, *rad53<sup>K227A</sup>*  
747 and *mrc1Δ* mutant cells at stages G1, HU45 and HU90 are shown. **c**, Summary of gene-origin  
748 relation in DEGs co-expression clusters for HU45 (*mrc1Δ* vs *WT*). Distance between each TSS and  
749 its nearest origin center is indicated in pink gradient as well as light purple (<2 kb) and dark purple  
750 (<1 kb). Relative TSS-origin orientation and origin type are indicated. **d**, Proportion of down/up  
751 regulation of DEGs as categorized by TSS to origin distance (left panels), origin type within 5 kb  
752 (middle panels) and orientation (right panels; CD: co-directional; HO: head-on).

753  
754 **Figure 7 – figure supplement 1. Origin-proximal DEGs are biased towards down-regulation in**  
755 **the *rad53<sup>K227A</sup>* mutant.**

756 **a**. Co-expression cluster matrix for significant DEGs in HU45 (*rad53<sup>K227A</sup>* vs *WT*). Cluster (C): color  
757 codes for DEG clusters. Gene(G): level of differential expression. **b**, Heatmaps of Rad53 ChIP-seq  
758 signal across 2 kb interval centered on TSS for DEG clusters above. ChIP-seq signal in *WT*,  
759 *rad53<sup>K227A</sup>* and *mrc1Δ* mutant cells at stages G1, HU45 and HU90 are shown. **c**, Summary of gene-

760 origin relation in DEGs co-expression clusters for HU45(*rad53*<sup>K227A</sup> vs WT). Distance between each  
761 TSS and its nearest origin center is indicated in pink gradient as well as light purple (<2 kb) and dark  
762 purple (<1 kb). Relative TSS-origin orientation and origin type are indicated.  
763

764 **Figure 8. SBF plays a major role in the localization of Rad53 to the promoters of its target**  
765 **genes under replication stress**

766 Differential binding of Rad53 at promoters and differential expression of target genes of SBF, MBF,  
767 Msn4 and Ste12. **a**, Top panels: scatter plots of binding changes (DB residual) and expression  
768 changes (log2 Fold change) for targets of indicated transcription regulators that are in the 236  
769 significant DEGs in the Top DB overlap (Figure 4). Bottom panels: scatter plots above adding the  
770 expression change data from the checkpoint mutants. Enrichment of transcription regulator targets in  
771 the 236 Top DB DEGs. **b**, Top panels: Scatter plots illustrating the Rad53 signal upstream of TSS for  
772 all genes in *WT*, *ixr1Δ*, *swi4Δ* and *swi6Δ* mutants. SBF targets found in the 435 Top DB overlap are  
773 show as orange or red diamond and *RNR1* in red diamond. Bottom panels: Close-up for specific area  
774 from above panels. **c**, Distribution of Rad53 ChIP-seq signal near selected Top DB genes that are  
775 targets of SBF, MBF, Ixr1 or Rfx1 in *WT*, *ixr1Δ*, *swi4Δ* and *swi6Δ* mutants at stages of G1, HU45  
776 and HU90.  
777

778 **Figure 8 – figure supplement 1. Differential binding of Rad53 at promoter and differential**  
779 **expression of target genes of SBF, MBF, Msn4 and Ste12.**

780 **a, b, c and d**, Targets of SBF, MBF, Ste12 and Msn4, respectively. Scatter plots of binding changes  
781 (DB residual) and expression changes (log2 Fold change) for targets of indicated transcription  
782 regulators that are in the 236 significant DEGs in the Top DB overlap. Expression change data from  
783 *WT*, *rad53*<sup>K227A</sup>, *mrc1Δ* and *rad9Δ* are presented in pairwise manner for comparison and column  
784 graphs of expression change data from *WT*, *rad53*<sup>K227A</sup>, *mrc1Δ* and *rad9Δ* cells for genes presented in  
785 the scatter plots above.  
786



787 **References**

- 788
- 789
- 790 Alepuz PM, Jovanovic A, Reiser V, Ammerer G. 2001. Stress-Induced MAP Kinase Hog1 Is Part of  
791 Transcription Activation Complexes. *Mol Cell* **7**:767–777. doi:10.1016/s1097-2765(01)00221-0
- 792 Bacal J, Carretero MM, Pardo B, Barthe A, Sharma S, Chabes A, Lengronne A, Pasero P. 2018. Mrc1  
793 and Rad9 cooperate to regulate initiation and elongation of DNA replication in response to DNA  
794 damage. *The EMBO journal* e99319. doi:10.15252/embj.201899319
- 795 Bastos de Oliveira FM, Kim D, Cussiol JR, Das J, Jeong MC, Doerfler L, Schmidt KH, Yu H,  
796 Smolka MB. 2015. Phosphoproteomics Reveals Distinct Modes of Mec1/ATR Signaling during  
797 DNA Replication. *Mol Cell* **57**:1124–1132. doi:10.1016/j.molcel.2015.01.043
- 798 Behrouzi R, Lu C, Currie M, Jih G, Iglesias N, Moazed D. 2016. Heterochromatin assembly by  
799 interrupted Sir3 bridges across neighboring nucleosomes. *Elife* **5**:e17556. doi:10.7554/elife.17556
- 800 Bell SP, Labib K. 2016. Chromosome Duplication in *Saccharomyces cerevisiae*. *Genetics* **203**:1027–  
801 1067. doi:10.1534/genetics.115.186452
- 802 Bermejo R, Capra T, Jossen R, Colosio A, Frattini C, Carotenuto W, Cocito A, Doksani Y, Klein H,  
803 Gómez-González B, Aguilera A, Katou Y, Shirahige K, Foiani M. 2011. The Replication  
804 Checkpoint Protects Fork Stability by Releasing Transcribed Genes from Nuclear Pores. *Cell*  
805 **146**:233–246. doi:10.1016/j.cell.2011.06.033
- 806 Breeden LL. 2003. Periodic Transcription: A Cycle within a Cycle. *Curr Biol* **13**:R31–R38.  
807 doi:10.1016/s0960-9822(02)01386-6
- 808 Bruhn C, Ajazi A, Ferrari E, Lanz MC, Batrin R, Choudhary R, Walvekar A, Laxman S, Longhese  
809 MP, Fabre E, Smolka MB, Foiani M. 2020. The Rad53CHK1/CHK2-Spt21NPAT and Tel1ATM  
810 axes couple glucose tolerance to histone dosage and subtelomeric silencing. *Nat Commun* **11**:4154.  
811 doi:10.1038/s41467-020-17961-4
- 812 Bruin RAM de, Kalashnikova TI, Chahwan C, McDonald WH, Wohlschlegel J, Yates J, Russell P,  
813 Wittenberg C. 2006. Constraining G1-Specific Transcription to Late G1 Phase: The MBF-  
814 Associated Corepressor Nrm1 Acts via Negative Feedback. *Mol Cell* **23**:483–496.  
815 doi:10.1016/j.molcel.2006.06.025
- 816 Callegari AJ, Kelly TJ. 2006. UV irradiation induces a postreplication DNA damage checkpoint.  
817 *Proc National Acad Sci* **103**:15877–15882. doi:10.1073/pnas.0607343103
- 818 Can G, Kauerhof AC, Macak D, Zegerman P. 2018. Helicase Subunit Cdc45 Targets the Checkpoint  
819 Kinase Rad53 to Both Replication Initiation and Elongation Complexes after Fork Stalling. *Mol*  
820 *Cell* **73**. doi:10.1016/j.molcel.2018.11.025

- 821 Cobb JA, Schleker T, Rojas V, Bjergbaek L, Tercero JA, Gasser SM. 2005. Replisome instability,  
822 fork collapse, and gross chromosomal rearrangements arise synergistically from Mec1 kinase and  
823 RecQ helicase mutations. *Genes & Development* **19**:3055–3069. doi:10.1101/gad.361805
- 824 Desany BA, Alcasabas AA, Bachant JB, Elledge SJ. 1998. Recovery from DNA replicational stress is  
825 the essential function of the S-phase checkpoint pathway. *Gene Dev* **12**:1–15.  
826 doi:10.1101/gad.12.18.2956
- 827 Devbhandari S, Remus D. 2020. Rad53 limits CMG helicase uncoupling from DNA synthesis at  
828 replication forks. *Nat Struct Mol Biol* **27**:461–471. doi:10.1038/s41594-020-0407-7
- 829 Dobin A, Davis CA, Schlesinger F, Drenkow J, Zaleski C, Jha S, Batut P, Chaisson M, Gingeras TR.  
830 2013. STAR: ultrafast universal RNA-seq aligner. *Bioinformatics* **29**:15–21.  
831 doi:10.1093/bioinformatics/bts635
- 832 Forey R, Poveda A, Sharma S, Barthe A, Padioleau I, Renard C, Lambert R, Skrzypczak M, Ginalski  
833 K, Lengronne A, Chabes A, Pardo B, Pasero P. 2020. Mec1 Is Activated at the Onset of Normal S  
834 Phase by Low-dNTP Pools Impeding DNA Replication. *Molecular Cell*.  
835 doi:10.1016/j.molcel.2020.02.021
- 836 Freese NH, Norris DC, Loraine AE. 2016. Integrated genome browser: visual analytics platform for  
837 genomics. *Bioinformatics* **32**:2089–2095. doi:10.1093/bioinformatics/btw069
- 838 Gilbert CS, Green CM, Lowndes NF. 2001. Budding Yeast Rad9 Is an ATP-Dependent Rad53  
839 Activating Machine. *Mol Cell* **8**:129–136. doi:10.1016/s1097-2765(01)00267-2
- 840 Gradolatto A, Rogers RS, Lavender H, Taverna SD, Allis CD, Aitchison JD, Tackett AJ. 2008.  
841 *Saccharomyces cerevisiae* Yta7 Regulates Histone Gene Expression. *Genetics* **179**:291–304.  
842 doi:10.1534/genetics.107.086520
- 843 Gunjan A, Verreault A. 2003. A Rad53 kinase-dependent surveillance mechanism that regulates  
844 histone protein levels in *S. cerevisiae*. *Cell* **115**:537–549. doi:10.1016/s0092-8674(03)00896-1
- 845 Hamperl S, Cimprich KA. 2016. Conflict Resolution in the Genome: How Transcription and  
846 Replication Make It Work. *Cell* **167**:1455–1467. doi:10.1016/j.cell.2016.09.053
- 847 Hoch NC, Chen ESW, Buckland R, Wang S-C, Fazio A, Hammet A, Pellicioli A, Chabes A, Tsai M-  
848 D, Heierhorst J. 2013. Molecular basis of the essential s phase function of the rad53 checkpoint  
849 kinase. *Molecular and Cellular Biology* **33**:3202–3213. doi:10.1128/mcb.00474-13
- 850 Holzen TM, Sclafani RA. 2010. Genetic interaction of RAD53 protein kinase with histones is  
851 important for DNA replication. *Cell Cycle* **9**:4735–4747. doi:10.4161/cc.9.23.14091
- 852 Huang M, Zhou Z, Elledge SJ. 1998. The DNA Replication and Damage Checkpoint Pathways  
853 Induce Transcription by Inhibition of the Crt1 Repressor. *Cell* **94**:595–605. doi:10.1016/s0092-  
854 8674(00)81601-3

- 855 Jaehnig EJ, Kuo D, Hombauer H, Ideker TG, Kolodner RD. 2013. Checkpoint kinases regulate a  
856 global network of transcription factors in response to DNA damage. *Cell reports* **4**:174–188.  
857 doi:10.1016/j.celrep.2013.05.041
- 858 Kim K-Y, Truman AW, Levin DE. 2008. Yeast Mpk1 Mitogen-Activated Protein Kinase Activates  
859 Transcription through Swi4/Swi6 by a Noncatalytic Mechanism That Requires Upstream Signal  
860 †. *Mol Cell Biol* **28**:2579–2589. doi:10.1128/mcb.01795-07
- 861 Kumar S, Huberman JA. 2008. Checkpoint-Dependent Regulation of Origin Firing and Replication  
862 Fork Movement in Response to DNA Damage in Fission Yeast ‡. *Mol Cell Biol* **29**:602–611.  
863 doi:10.1128/mcb.01319-08
- 864 Langmead B. 2010. Aligning Short Sequencing Reads with Bowtie. *Curr Protoc Bioinform*  
865 **32**:11.7.1-11.7.14. doi:10.1002/0471250953.bi1107s32
- 866 Lanz MC, Dibitetto D, Smolka MB. 2019. DNA damage kinase signaling: checkpoint and repair at 30  
867 years. *Embo J* **38**:e101801. doi:10.15252/embj.2019101801
- 868 Lao JP, Ulrich KM, Johnson JR, Newton BW, Vashisht AA, Wohlschlegel JA, Krogan NJ, Toczyski  
869 DP. 2018. The Yeast DNA Damage Checkpoint Kinase Rad53 Targets the Exoribonuclease, Xrn1.  
870 *G3 Genes Genomes Genetics* **8**:g3.200767.2018. doi:10.1534/g3.118.200767
- 871 Lee J, Shah M, Ballouz S, Crow M, Gillis J. 2020. CoCoCoNet: conserved and comparative co-  
872 expression across a diverse set of species. *Nucleic Acids Res* **48**:gkaa348-  
873 doi:10.1093/nar/gkaa348
- 874 Lopes M, Cotta-Ramusino C, Pelliccioli A, Liberi G, Plevani P, Muzi-Falconi M, Newlon CS, Foiani  
875 M. 2001. The DNA replication checkpoint response stabilizes stalled replication forks. *Nature*  
876 **412**:557–561. doi:10.1038/35087613
- 877 Lou H, Komata M, Katou Y, Guan Z, Reis CC, Budd M, Shirahige K, Campbell JL. 2008. Mrc1 and  
878 DNA polymerase epsilon function together in linking DNA replication and the S phase checkpoint.  
879 *Molecular Cell* **32**:106–117. doi:10.1016/j.molcel.2008.08.020
- 880 Love MI, Huber W, Anders S. 2014. Moderated estimation of fold change and dispersion for RNA-  
881 seq data with DESeq2. *Genome Biol* **15**:550. doi:10.1186/s13059-014-0550-8
- 882 Manfrini N, Gobbin E, Baldo V, Trovesi C, Lucchini G, Longhese MP. 2012. G1/S and G2/M  
883 Cyclin-Dependent Kinase Activities Commit Cells to Death in the Absence of the S-Phase  
884 Checkpoint. *Mol Cell Biol* **32**:4971–4985. doi:10.1128/mcb.00956-12
- 885 McClure AW, Diffley J. 2021. Rad53 checkpoint kinase regulation of DNA replication fork rate via  
886 Mrc1 phosphorylation. doi:10.1101/2021.04.09.439171

- 887 Oliveira FMB de, Harris MR, Brazauskas P, Bruin RAM de, Smolka MB. 2012. Linking DNA  
888 replication checkpoint to MBF cell-cycle transcription reveals a distinct class of G1/S genes. *The*  
889 *EMBO Journal* **31**:1798–1810. doi:10.1038/emboj.2012.27
- 890 Osborn AJ, Elledge SJ. 2003. Mrc1 is a replication fork component whose phosphorylation in  
891 response to DNA replication stress activates Rad53. *Gene Dev* **17**:1755–1767.  
892 doi:10.1101/gad.1098303
- 893 Pardo B, Crabbé L, Pasero P. 2017. Signaling pathways of replication stress in yeast. *FEMS Yeast*  
894 *Research* **17**. doi:10.1093/femsyr/fow101
- 895 Park D, Lee Y, Bhupindersingh G, Iyer VR. 2013. Widespread Misinterpretable ChIP-seq Bias in  
896 Yeast. *Plos One* **8**:e83506. doi:10.1371/journal.pone.0083506
- 897 Paulovich AG, Hartwell LH. 1995. A checkpoint regulates the rate of progression through S phase in  
898 *S. cerevisiae* in Response to DNA damage. *Cell* **82**:841–847. doi:10.1016/0092-8674(95)90481-6
- 899 Pelliccioli A, Lucca C, Liberi G, Marini F, Lopes M, Plevani P, Romano A, Fiore PPD, Foiani M.  
900 1999. Activation of Rad53 kinase in response to DNA damage and its effect in modulating  
901 phosphorylation of the lagging strand DNA polymerase. *The EMBO Journal* **18**:6561–6572.  
902 doi:10.1093/emboj/18.22.6561
- 903 Ramírez F, Dünder F, Diehl S, Grüning BA, Manke T. 2014. deepTools: a flexible platform for  
904 exploring deep-sequencing data. *Nucleic Acids Res* **42**:W187–W191. doi:10.1093/nar/gku365
- 905 Renard-Guillet C, Kanoh Y, Shirahige K, Masai H. 2014. Temporal and spatial regulation of  
906 eukaryotic DNA replication: From regulated initiation to genome-scale timing program. *Semin*  
907 *Cell Dev Biol* **30**:110–120. doi:10.1016/j.semcdb.2014.04.014
- 908 Saldivar JC, Cortez D, Cimprich KA. 2017. The essential kinase ATR: ensuring faithful duplication  
909 of a challenging genome. *Nature Publishing Group* **16**:1–15. doi:10.1038/nrm.2017.67
- 910 Sanz AB, García R, Rodríguez-Peña JM, Nombela C, Arroyo J. 2018. Slr2 MAPK association with  
911 chromatin is required for transcriptional activation of Rlm1 dependent genes upon cell wall stress.  
912 *Biochimica Et Biophysica Acta Bba - Gene Regul Mech* **1861**:1029–1039.  
913 doi:10.1016/j.bbagr.2018.09.005
- 914 Seiler JA, Conti C, Syed A, Aladjem MI, Pommier Y. 2007. The Intra-S-Phase Checkpoint Affects  
915 both DNA Replication Initiation and Elongation: Single-Cell and -DNA Fiber Analyses. *Mol*  
916 *Cell Biol* **27**:5806–5818. doi:10.1128/mcb.02278-06
- 917 Sheu Y-J, Kinney JB, Lengronne A, Pasero P, Stillman B. 2014. Domain within the helicase subunit  
918 Mcm4 integrates multiple kinase signals to control DNA replication initiation and fork progression.  
919 *Proceedings of the National Academy of Sciences* **111**:E1899-908. doi:10.1073/pnas.1404063111

- 920 Sheu Y-J, Kinney JB, Stillman B. 2016. Concerted activities of Mcm4, Sld3, and Dbf4 in control of  
921 origin activation and DNA replication fork progression. *Genome Research* **26**:315–330.  
922 doi:10.1101/gr.195248.115
- 923 Sheu Y-J, Stillman B. 2006. Cdc7-Dbf4 phosphorylates MCM proteins via a docking site-mediated  
924 mechanism to promote S phase progression. *Mol Cell* **24**:101–113.  
925 doi:10.1016/j.molcel.2006.07.033
- 926 Sidorova JM, Breeden LL. 2003. Rad53 Checkpoint Kinase Phosphorylation Site Preference  
927 Identified in the Swi6 Protein of *Saccharomyces cerevisiae*. *Mol Cell Biol* **23**:3405–3416.  
928 doi:10.1128/mcb.23.10.3405-3416.2003
- 929 Siow CC, Nieduszynska SR, Müller CA, Nieduszynski CA. 2012. OriDB, the DNA replication origin  
930 database updated and extended. *Nucleic Acids Res* **40**:D682–D686. doi:10.1093/nar/gkr1091
- 931 Smolka MB, Albuquerque CP, Chen S, Zhou H. 2007. Proteome-wide identification of in vivo targets  
932 of DNA damage checkpoint kinases. *Proceedings of the National Academy of Sciences of the*  
933 *United States of America* **104**:10364–10369. doi:10.1073/pnas.0701622104
- 934 Smolka MB, Chen S, Maddox PS, Enserink JM, Albuquerque CP, Wei XX, Desai A, Kolodner RD,  
935 Zhou H. 2006. An FHA domain-mediated protein interaction network of Rad53 reveals its role in  
936 polarized cell growth. *The Journal of Cell Biology* **175**:743–753. doi:10.1083/jcb.200605081
- 937 Szyjka SJ, Aparicio JG, Viggiani CJ, Knott S, Xu W, Tavaré S, Aparicio OM. 2008. Rad53 regulates  
938 replication fork restart after DNA damage in *Saccharomyces cerevisiae*. *Gene Dev* **22**:1906–1920.  
939 doi:10.1101/gad.1660408
- 940 Tercero JA, Longhese MP, Diffley JFX. 2003. A Central Role for DNA Replication Forks in  
941 Checkpoint Activation and Response. *Mol Cell* **11**:1323–1336. doi:10.1016/s1097-  
942 2765(03)00169-2
- 943 Teytelman L, Thurtle DM, Rine J, Oudenaarden A van. 2013. Highly expressed loci are vulnerable to  
944 misleading ChIP localization of multiple unrelated proteins. *Proc National Acad Sci* **110**:18602–  
945 18607. doi:10.1073/pnas.1316064110
- 946 Tourrière H, Versini G, Cerdón-Preciado V, Alabert C, Pasero P. 2005. Mrc1 and Tof1 promote  
947 replication fork progression and recovery independently of Rad53. *Molecular Cell* **19**:699–706.
- 948 Travesa A, Kuo D, Bruin RAM de, Kalashnikova TI, Guaderrama M, Thai K, Aslanian A, Smolka  
949 MB, Yates JR, Ideker T, Wittenberg C. 2012. DNA replication stress differentially regulates G1/S  
950 genes via Rad53-dependent inactivation of Nrm1. *The EMBO Journal* **31**:1811–1822.  
951 doi:10.1038/emboj.2012.28
- 952 Tsaponina O, Barsoum E, Aström SU, Chabes A. 2011. Ixr1 is required for the expression of the  
953 ribonucleotide reductase Rnr1 and maintenance of dNTP pools. *PLoS Genetics* **7**:e1002061.  
954 doi:10.1371/journal.pgen.1002061



- 955 Viggiani CJ, Aparicio OM. 2006. New vectors for simplified construction of BrdU-Incorporating  
956 strains of *Saccharomyces cerevisiae*. *Yeast* **23**:1045–1051. doi:10.1002/yea.1406
- 957 Yabuki N, Terashima H, Kitada K. 2002. Mapping of early firing origins on a replication profile of  
958 budding yeast. *Genes Cells* **7**:781–789. doi:10.1046/j.1365-2443.2002.00559.x
- 959 Yeeles JTP, Janska A, Early A, Diffley JFX. 2016. How the Eukaryotic Replisome Achieves Rapid  
960 and Efficient DNA Replication. *Molecular Cell*. doi:10.1016/j.molcel.2016.11.017
- 961 Zhao X, Georgieva B, Chabes A, Domkin V, Ippel JH, Schleucher J, Wijmenga S, Thelander L,  
962 Rothstein R. 2000. Mutational and Structural Analyses of the Ribonucleotide Reductase Inhibitor  
963 Sml1 Define Its Rnr1 Interaction Domain Whose Inactivation Allows Suppression of *mec1* and  
964 *rad53* Lethality. *Mol Cell Biol* **20**:9076–9083. doi:10.1128/mcb.20.23.9076-9083.2000
- 965
- 966

967 **Supplemental Table 1**  
 968 Yeast strains used in this study

| Strain | genotype                                                                                                                  | source                             |
|--------|---------------------------------------------------------------------------------------------------------------------------|------------------------------------|
| YS2571 | <i>MATa bar1Δ::TRP1 URA3::BrdU-Inc ade2-1 can1-100 his3-11,-15 leu2-3,112 trp1-1 ura3-1</i>                               | Sheu et al 2014(Sheu et al., 2014) |
| YS3110 | <i>MATa rad53<sup>K227A</sup>::KanMX4 bar1Δ::TRP1 URA3::BrdU-Inc ade2-1 can1-100 his3-11,-15 leu2-3,112 trp1-1 ura3-1</i> | This study                         |
| YS3285 | <i>MATa mrc1Δ::KanMX4 bar1Δ::TRP1 URA3::BrdU-Inc ade2-1 can1-100 his3-11,-15 leu2-3,112 trp1-1 ura3-1</i>                 | This study                         |
| YS3382 | <i>MATa rad9Δ::HIS3 bar1Δ::TRP1 URA3::BrdU-Inc ade2-1 can1-100 his3-11,-15 leu2-3,112 trp1-1 ura3-1</i>                   | This study                         |
| YS3388 | <i>MATa ixr1Δ::HIS3 bar1Δ::TRP1 URA3::BrdU-Inc ade2-1 can1-100 his3-11,-15 leu2-3,112 trp1-1 ura3-1</i>                   | This study                         |
| YS3401 | <i>MATa swi4Δ::HIS3 bar1Δ::TRP1 URA3::BrdU-Inc ade2-1 can1-100 his3-11,-15 leu2-3,112 trp1-1 ura3-1</i>                   | This study                         |
| YS3406 | <i>MATa swi6Δ::HIS3 bar1Δ::TRP1 URA3::BrdU-Inc ade2-1 can1-100 his3-11,-15 leu2-3,112 trp1-1 ura3-1</i>                   | This study                         |
| YS2828 | <i>MATa URA3::BrdU-Inc ade2-1 can1-100 his3-11,-15 leu2-3,112 trp1-1 ura3-1</i>                                           | Sheu et al 2016(Sheu et al., 2016) |
| YS3066 | <i>MATa sml1Δ::HIS3 URA3::BrdU-Inc ade2-1 can1-100 his3-11,-15 leu2-3,112 trp1-1 ura3-1</i>                               | Sheu et al 2016(Sheu et al., 2016) |
| YS3075 | <i>MATa mec1Δ::TRP1 sml1Δ::HIS3 URA3::BrdU-Inc ade2-1 can1-100 his3-11,-15 leu2-3,112 trp1-1 ura3-1</i>                   | Sheu et al 2016(Sheu et al., 2016) |
| YS3077 | <i>MATa rad53Δ::KanMX sml1Δ::HIS3 URA3::BrdU-Inc ade2-1 can1-100 his3-11,-15 leu2-3,112 trp1-1 ura3-1</i>                 | Sheu et al 2016(Sheu et al., 2016) |

969  
 970

**Figure 1**

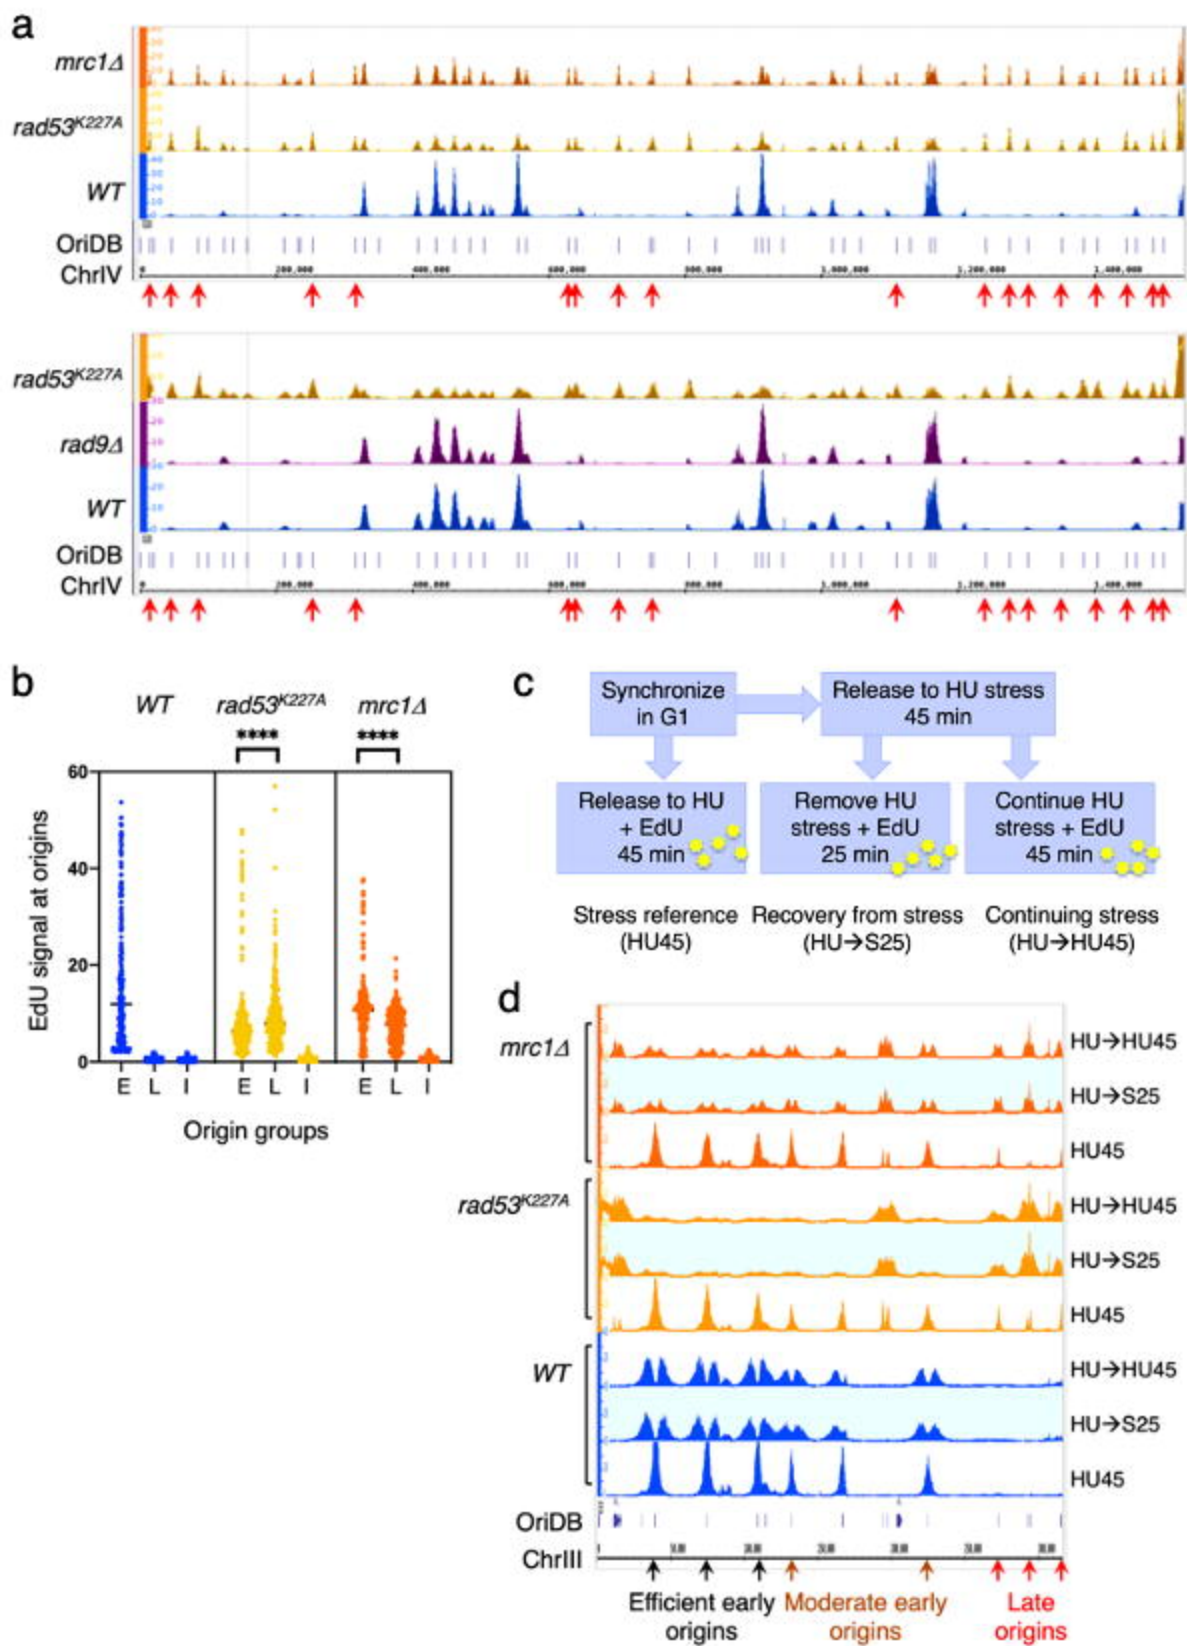

Figure 1 - figure supplement

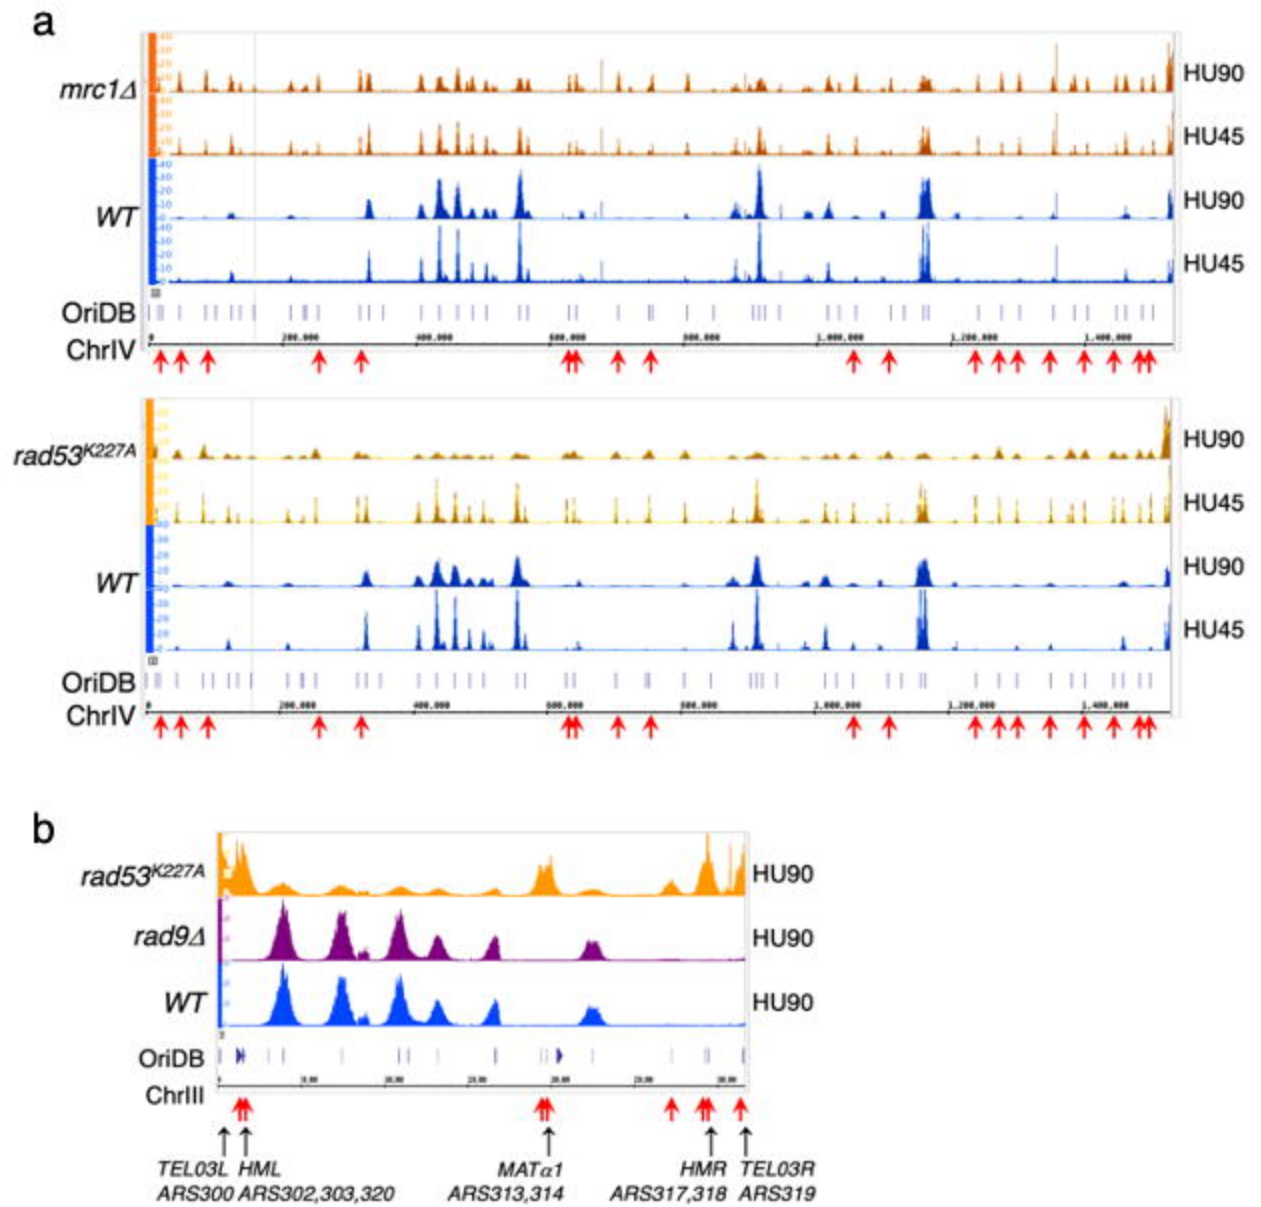



**Figure 2**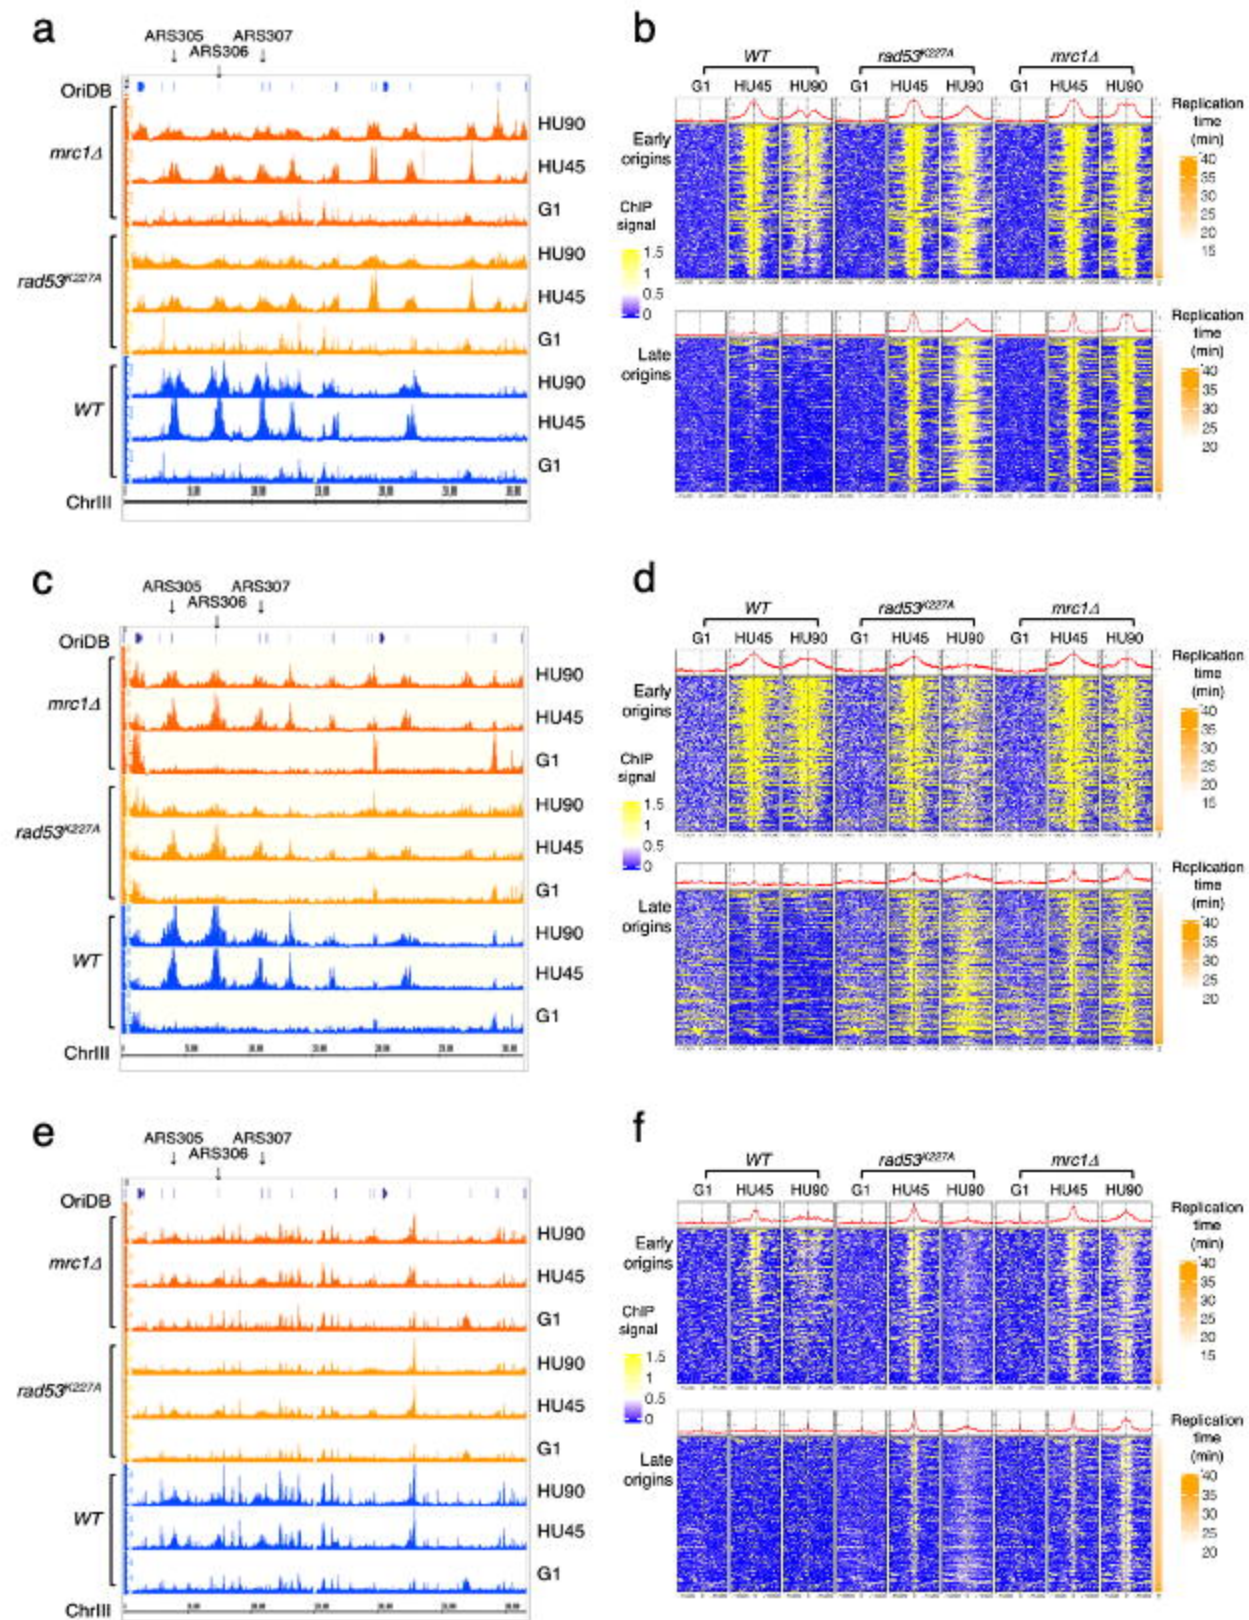



Figure 2 – figure supplement 1

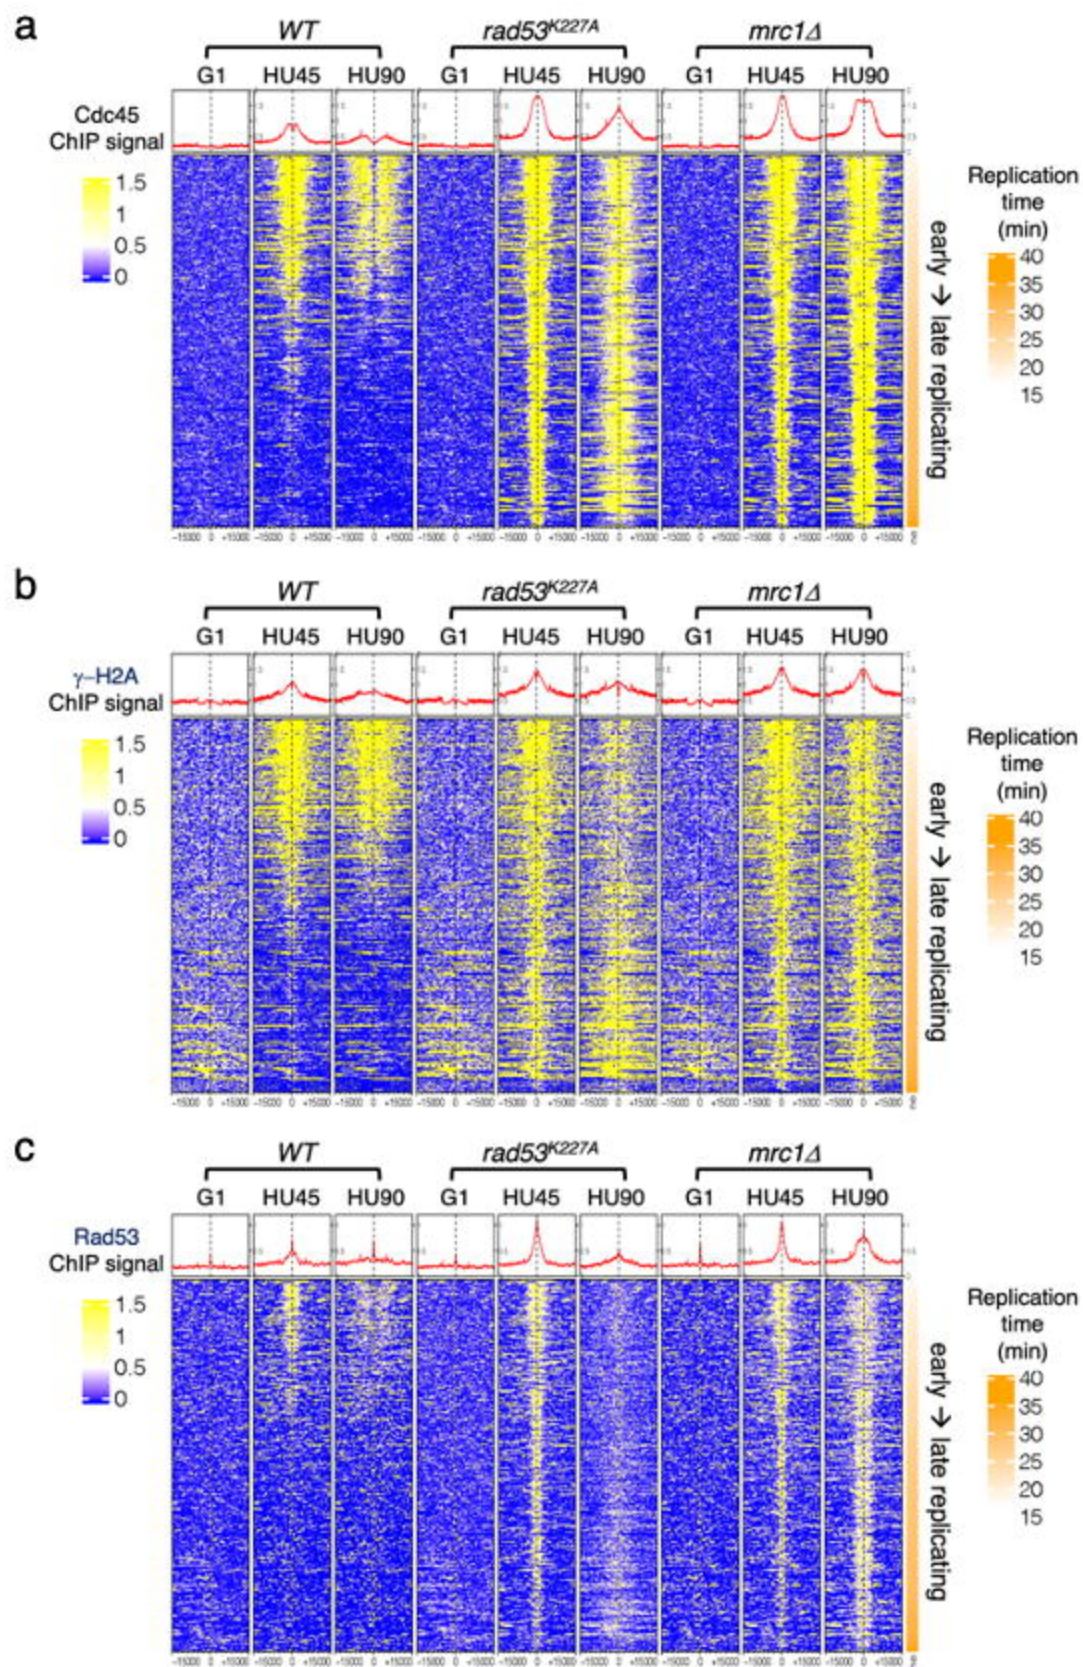

**Figure 3**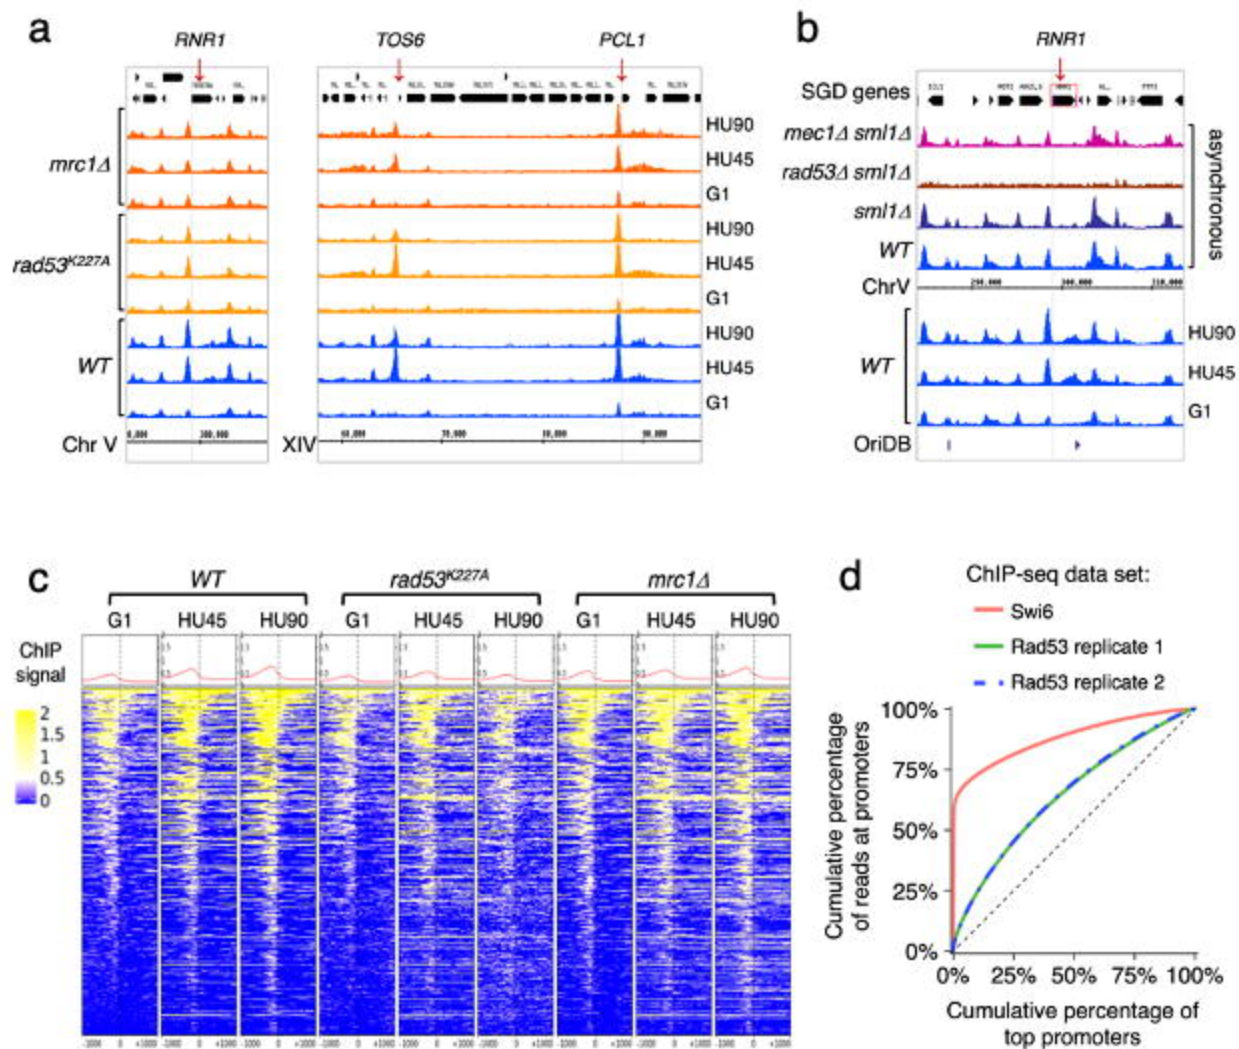



**Figure 3 – figure supplement 1**

**a**

**Rad53 ChIP-seq in WT and mutant cells**

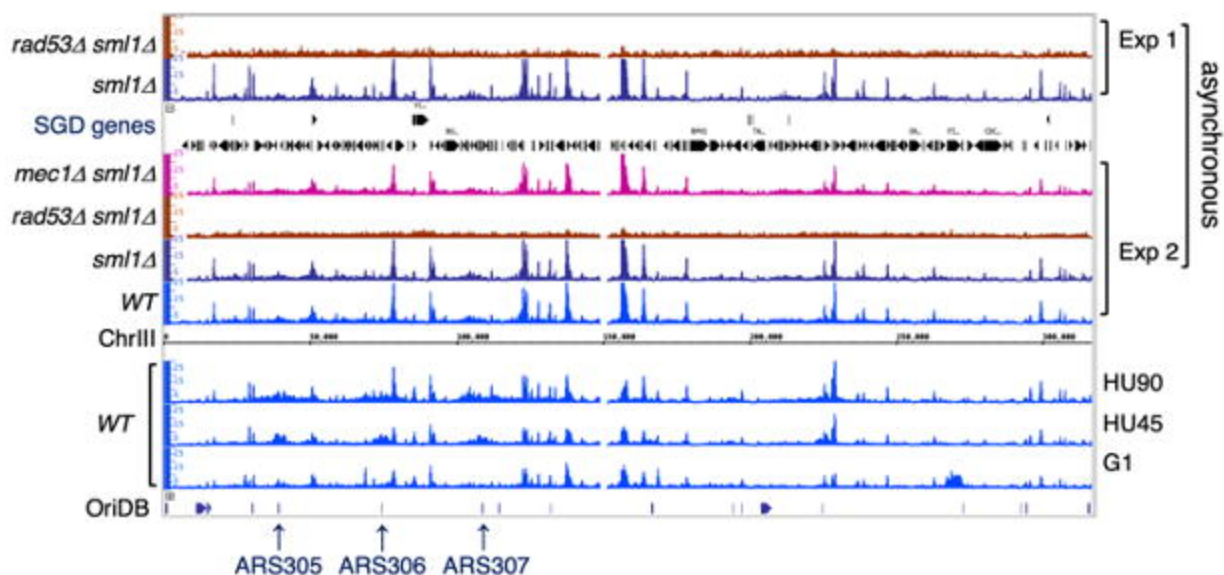

**b**

**Distribution of Rad53 peaks in relation to genes**

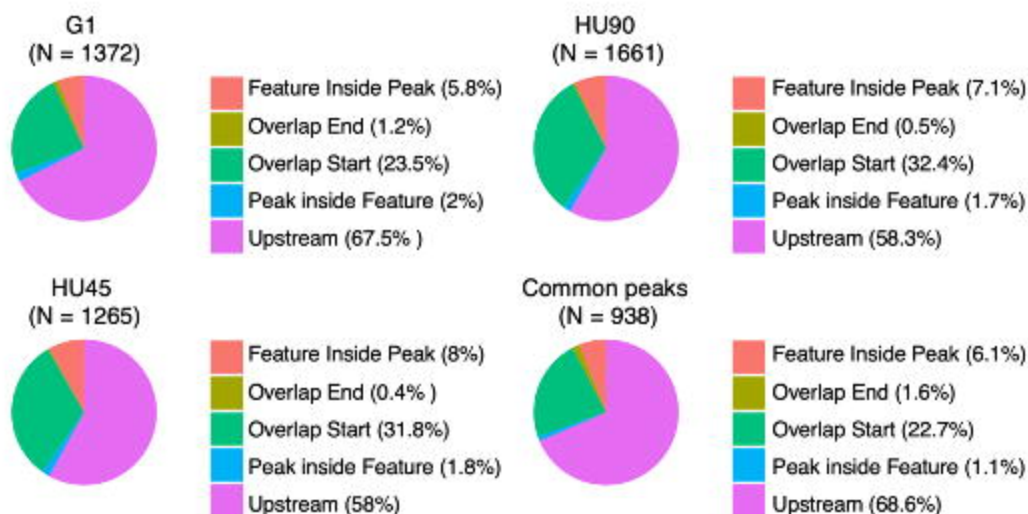

**Figure 3 – figure supplement 2**

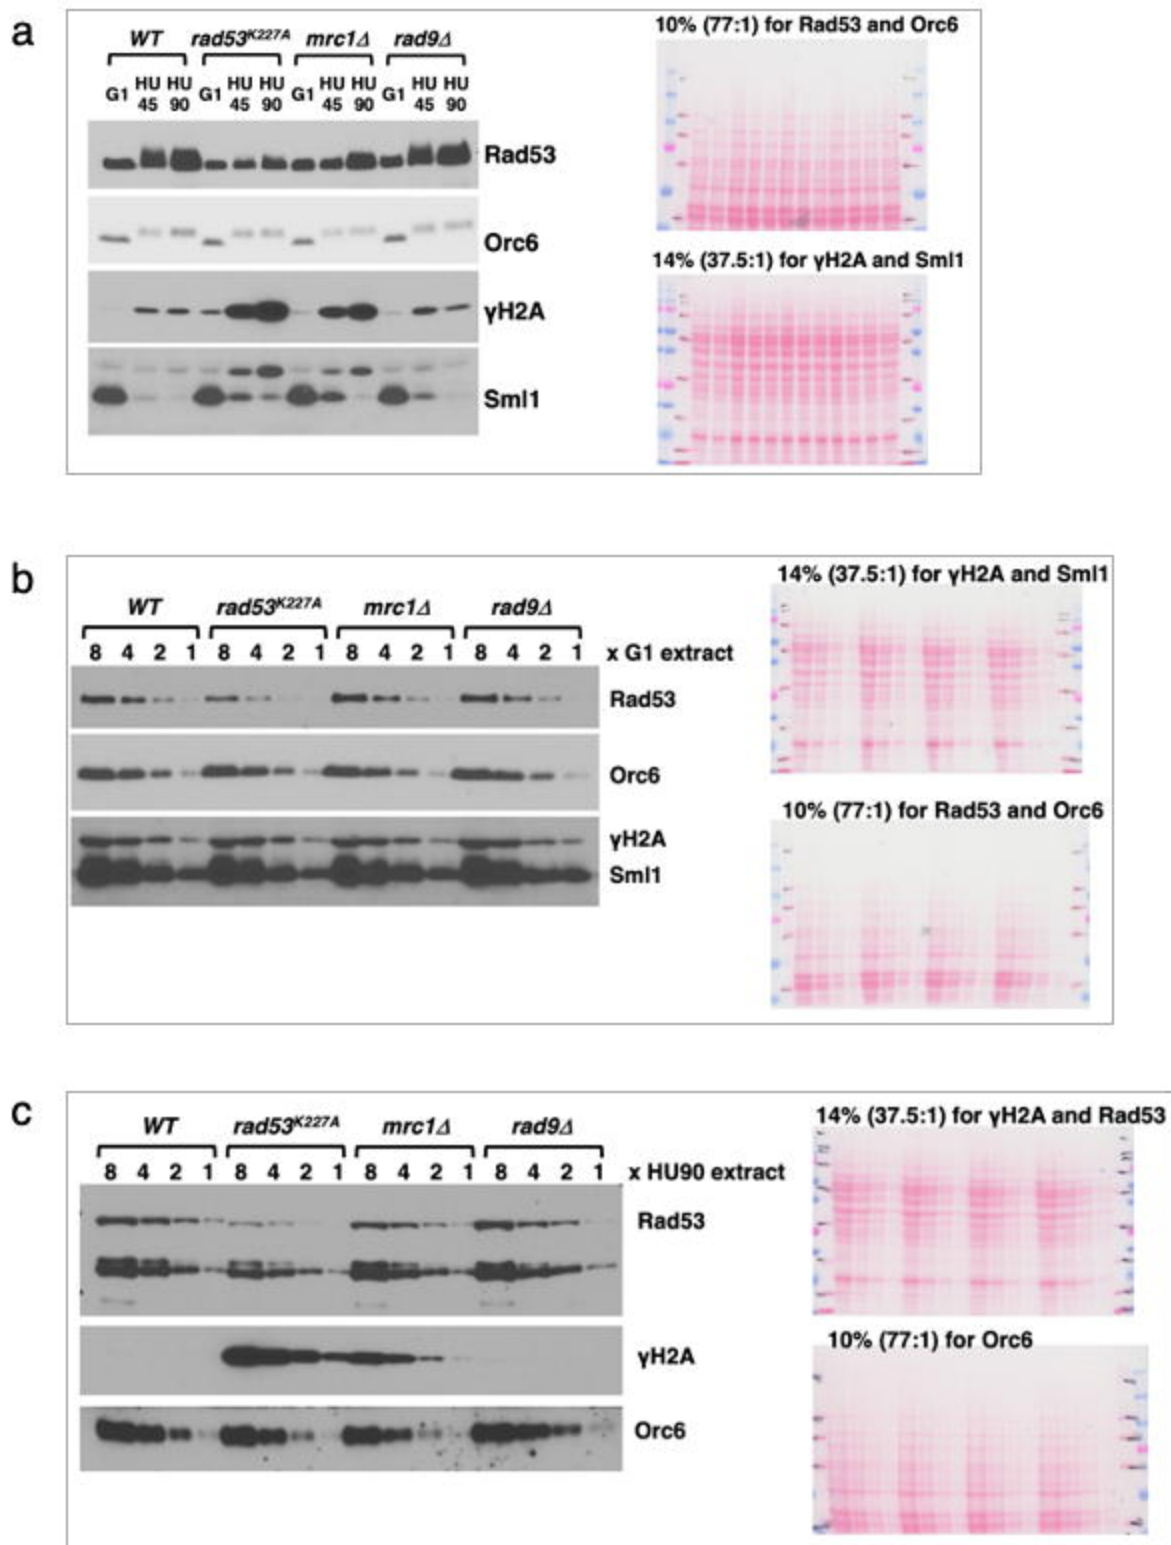

Figure 3 – figure supplement 3

a

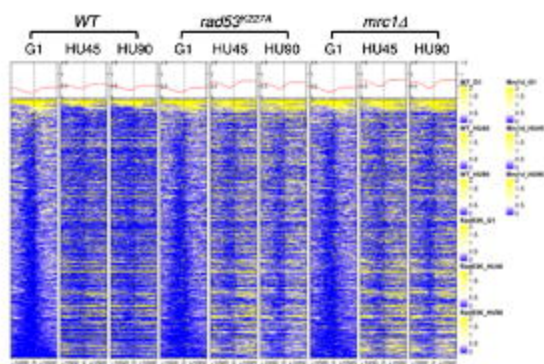

b

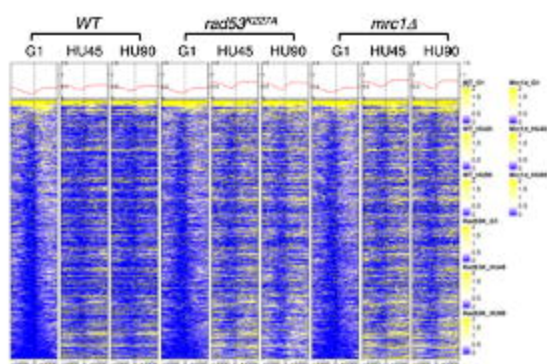



**Figure 3 – figure supplement 4**

**a**

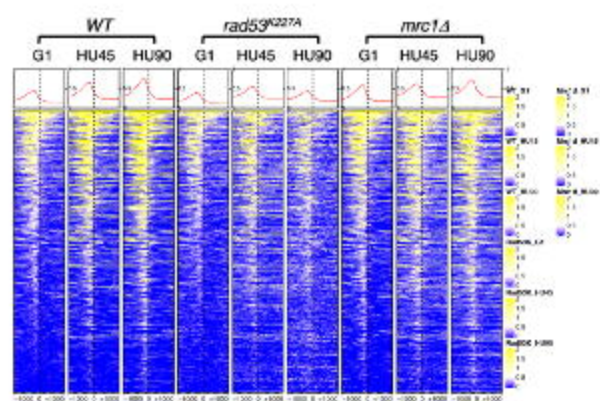

**b**

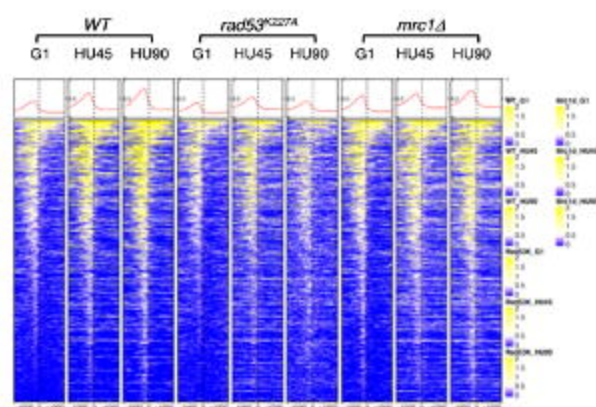

**c**

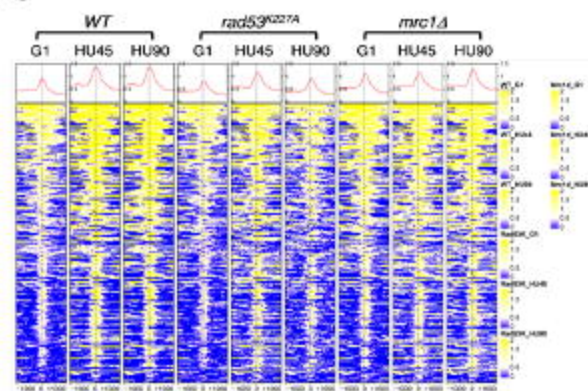

Figure 3 – figure supplement 5

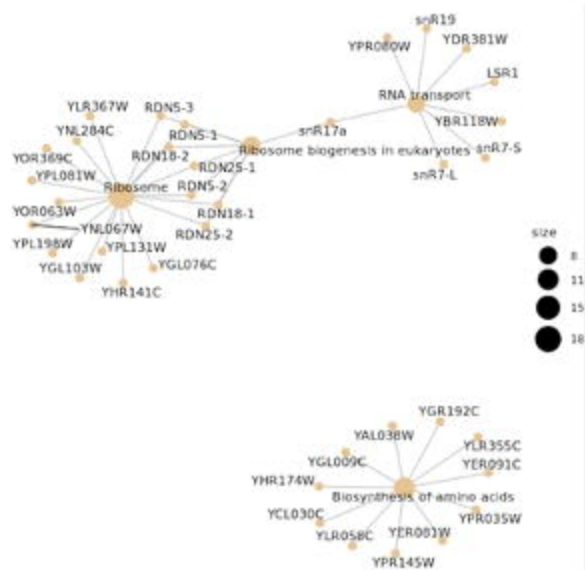

**Figure 4**

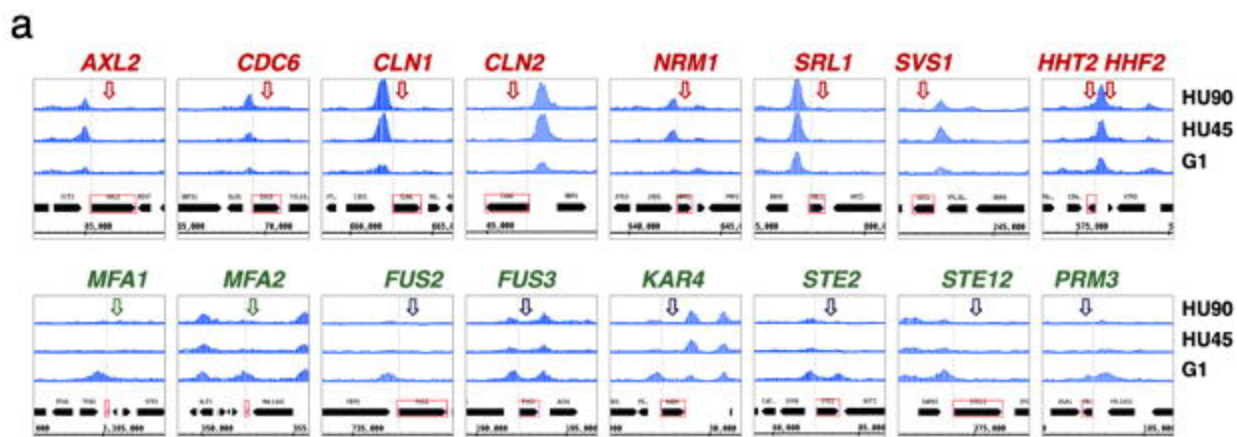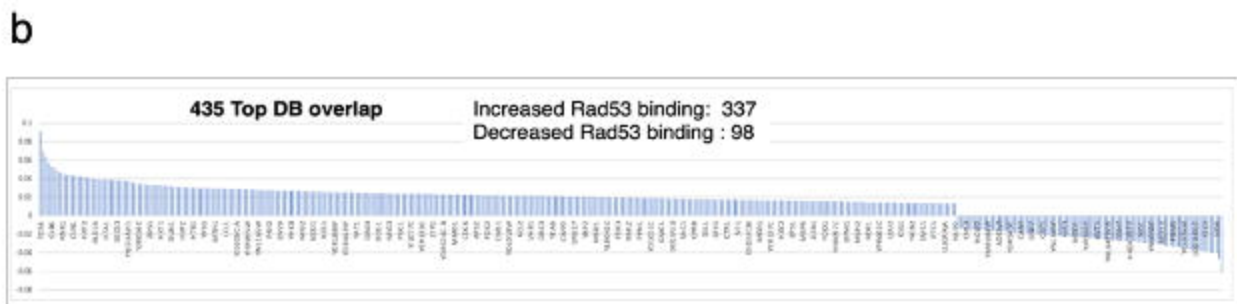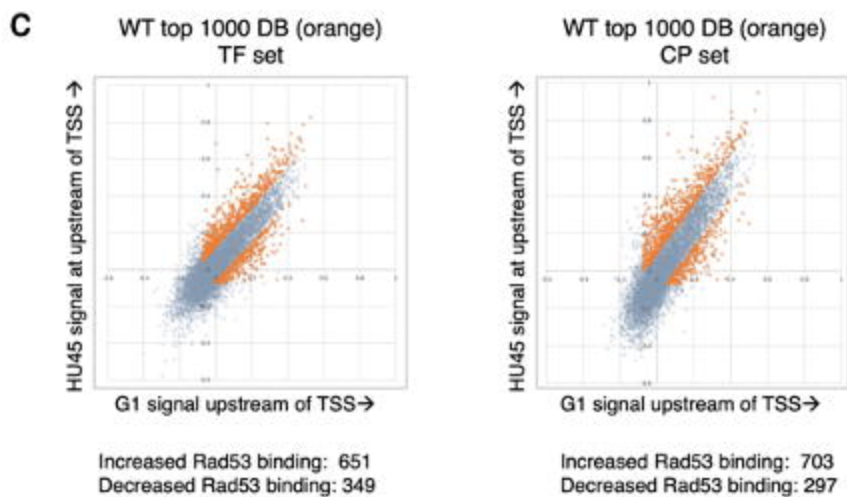

**Figure 5**

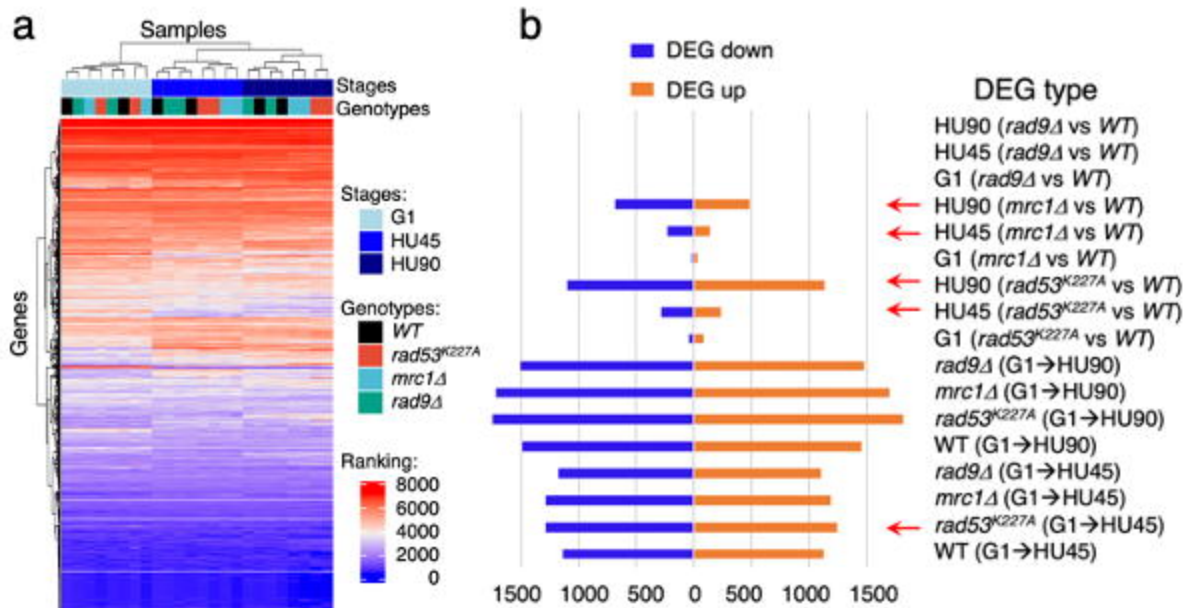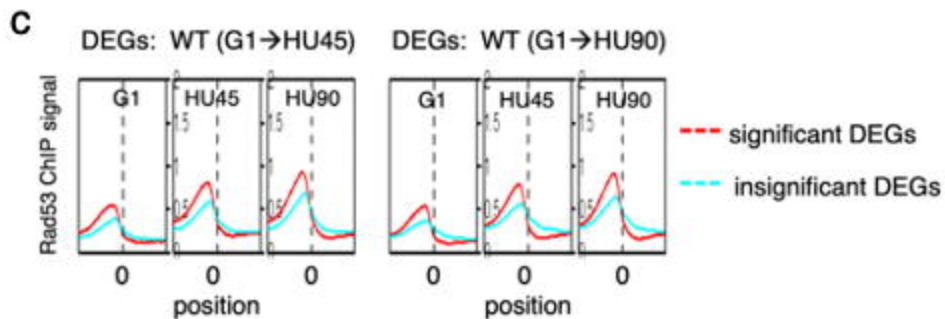



Figure 5 – figure supplement 1

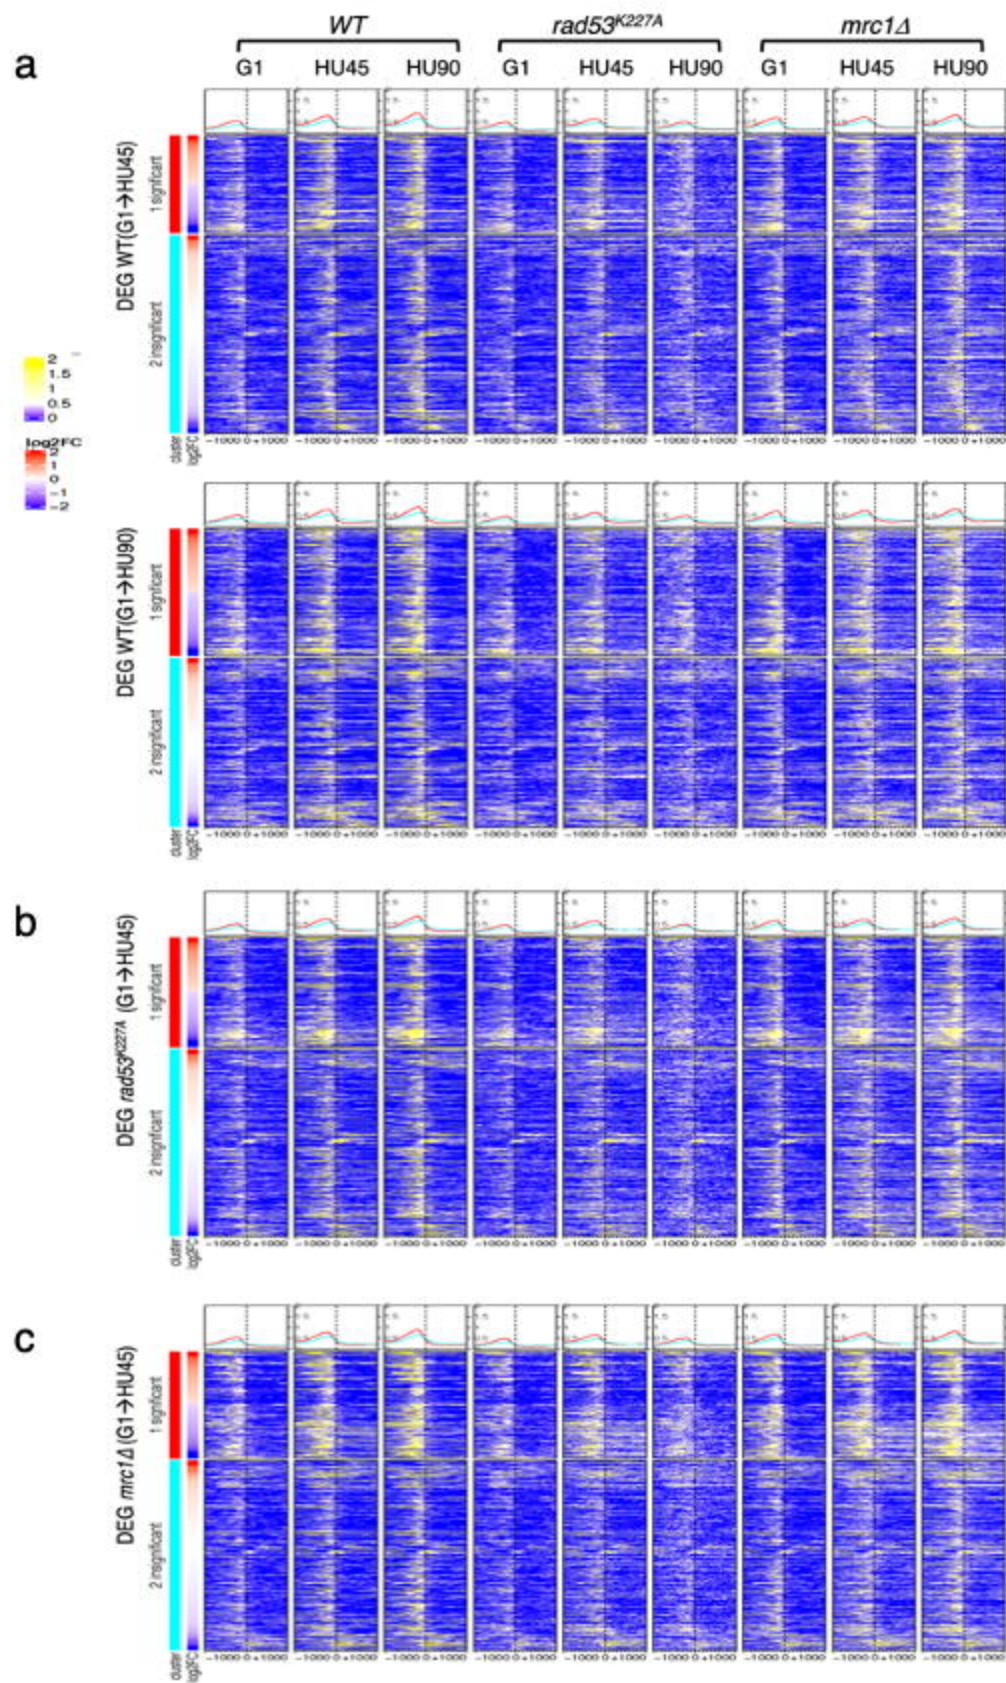



**Figure 6**

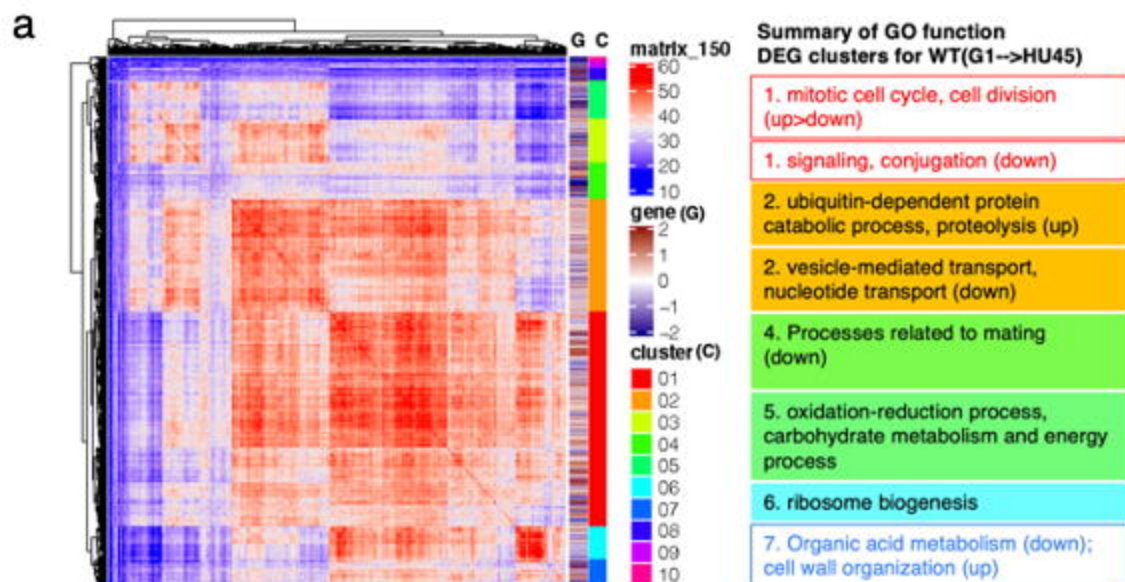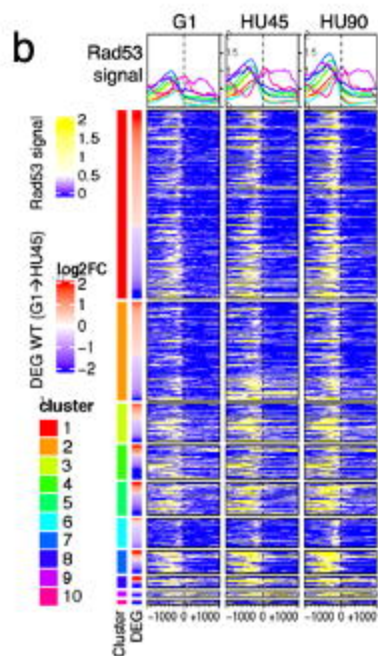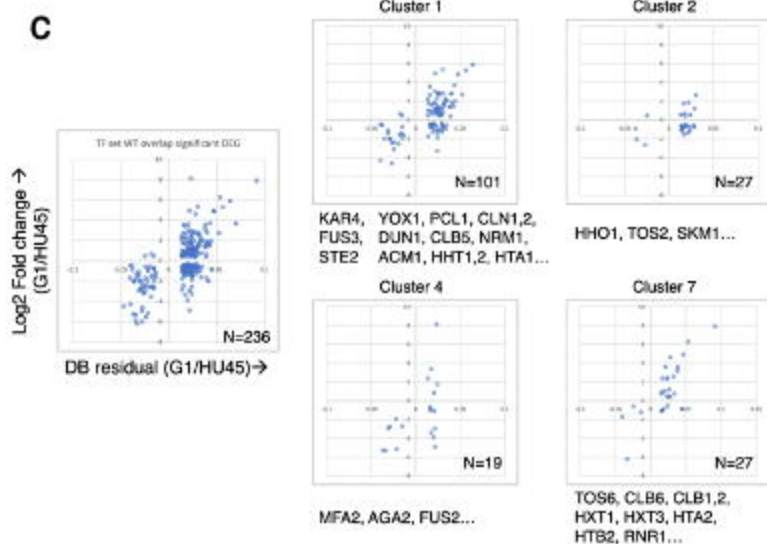

Figure 6 – figure supplement 1

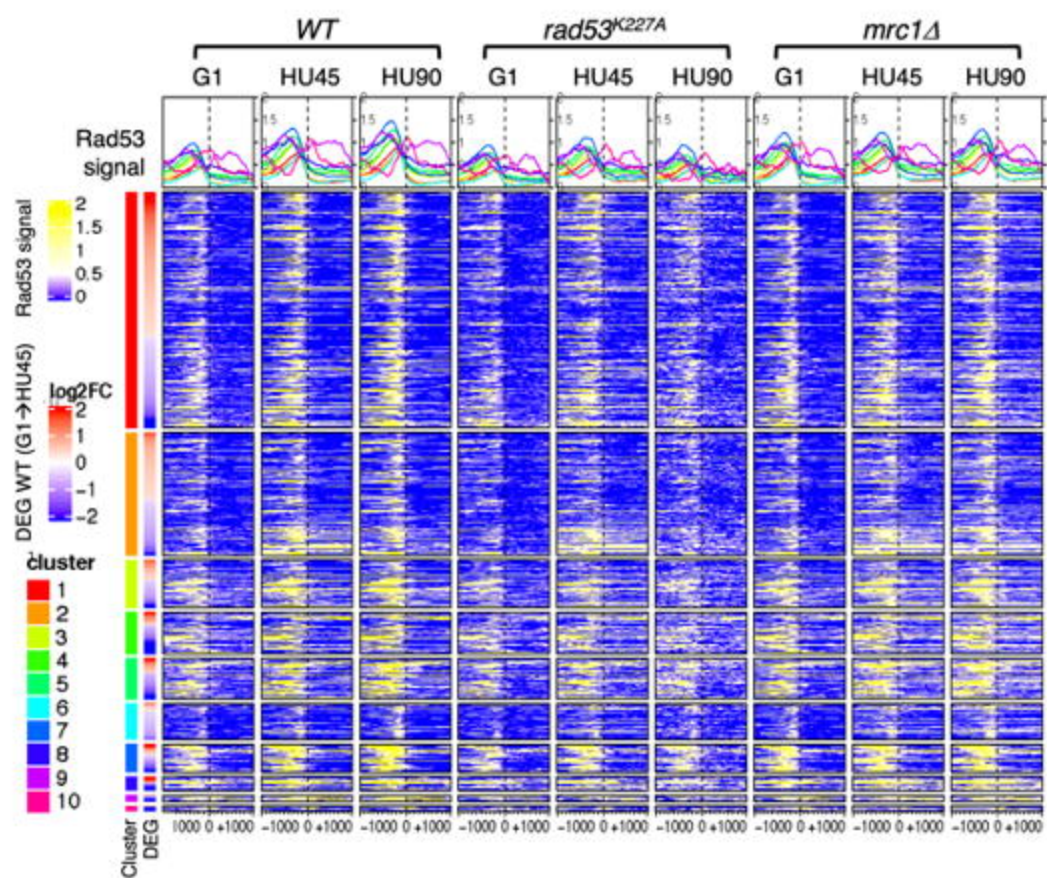



**Figure 7**

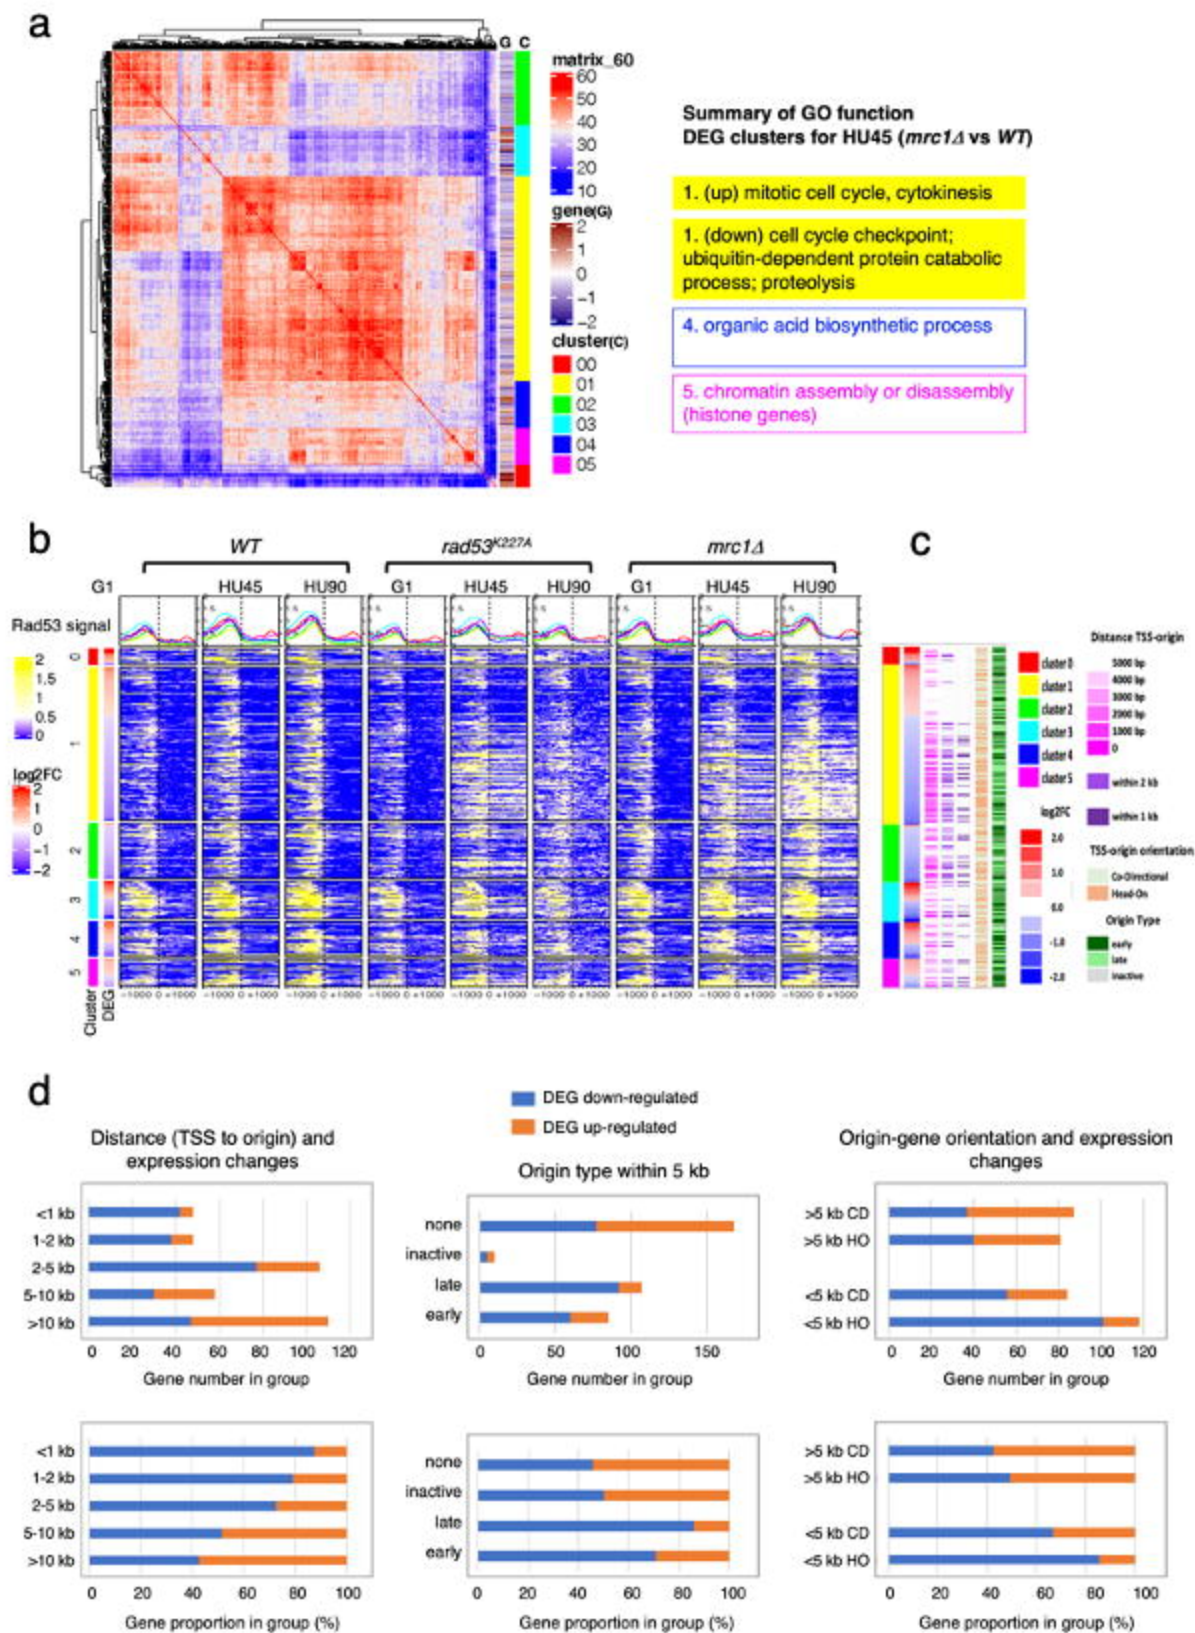

**Figure 7 – figure supplement 1**

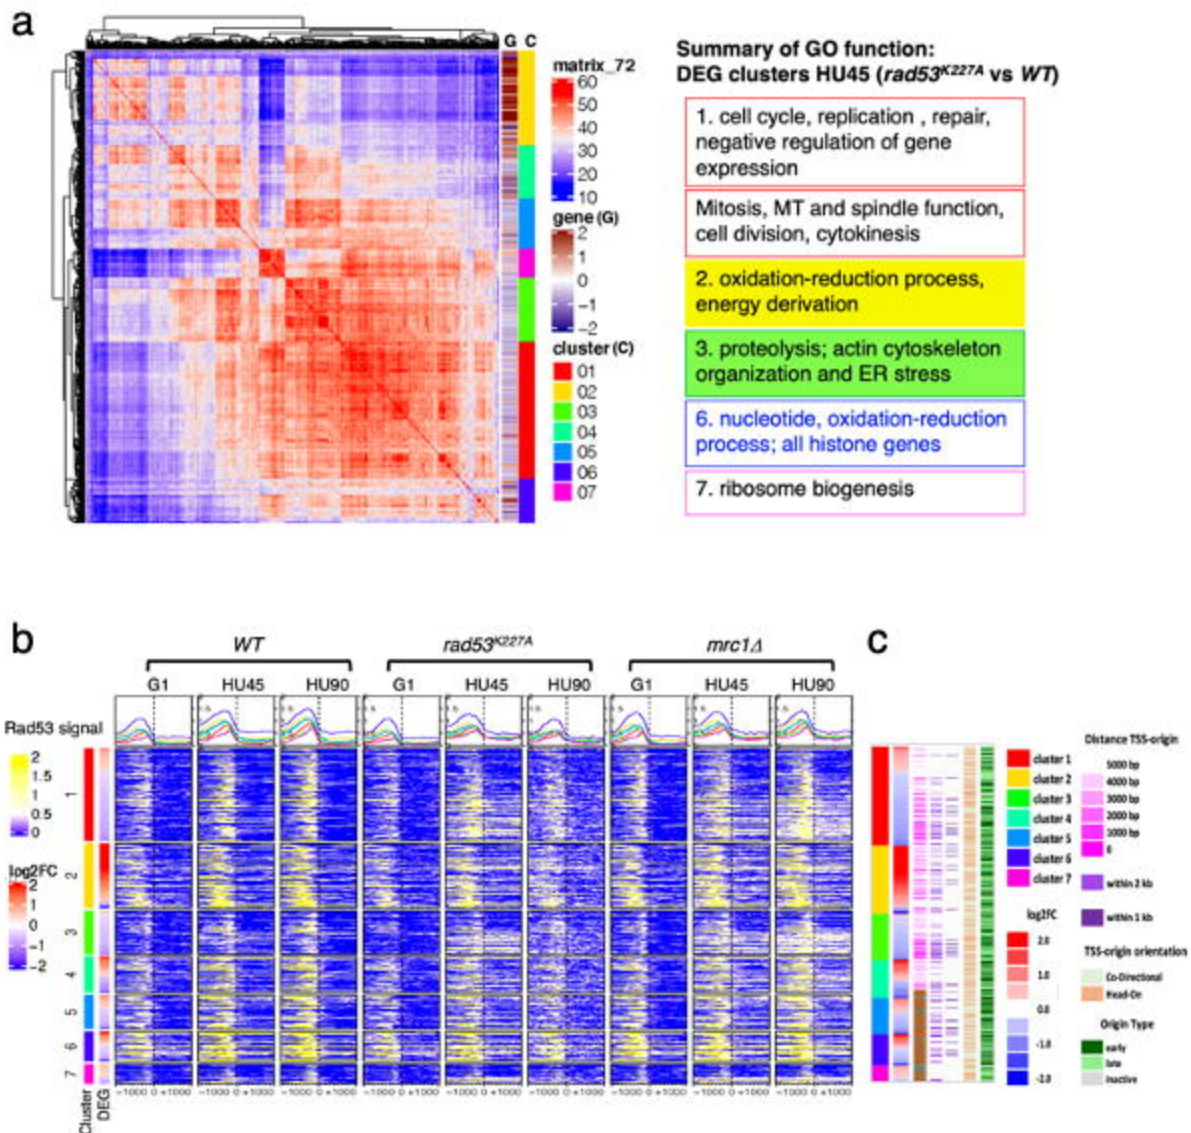



**Figure 8**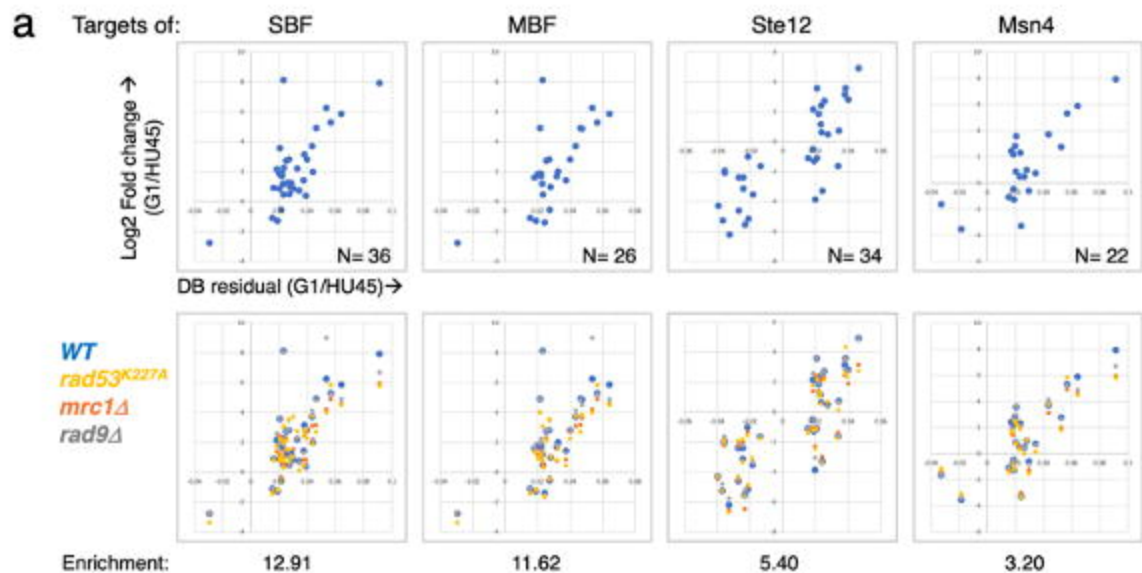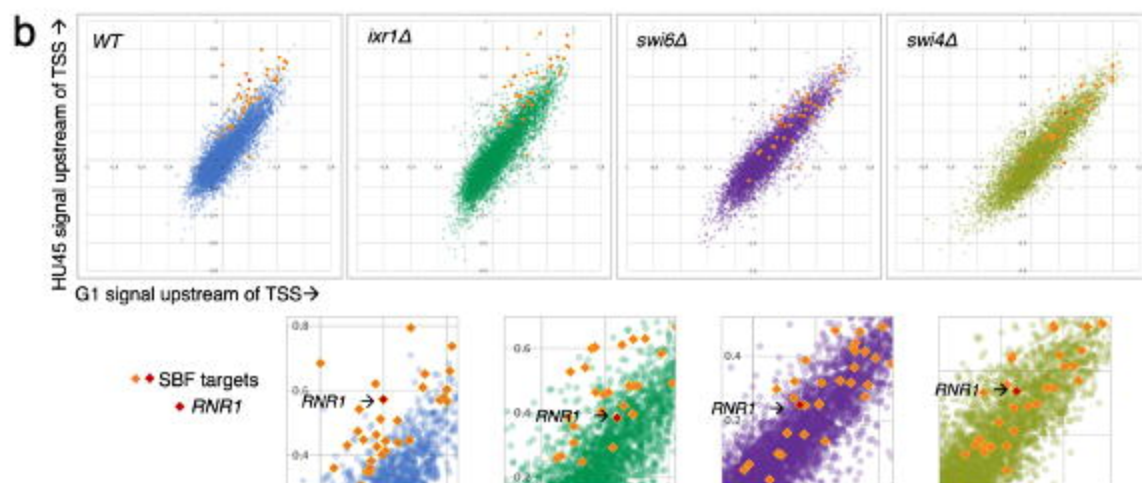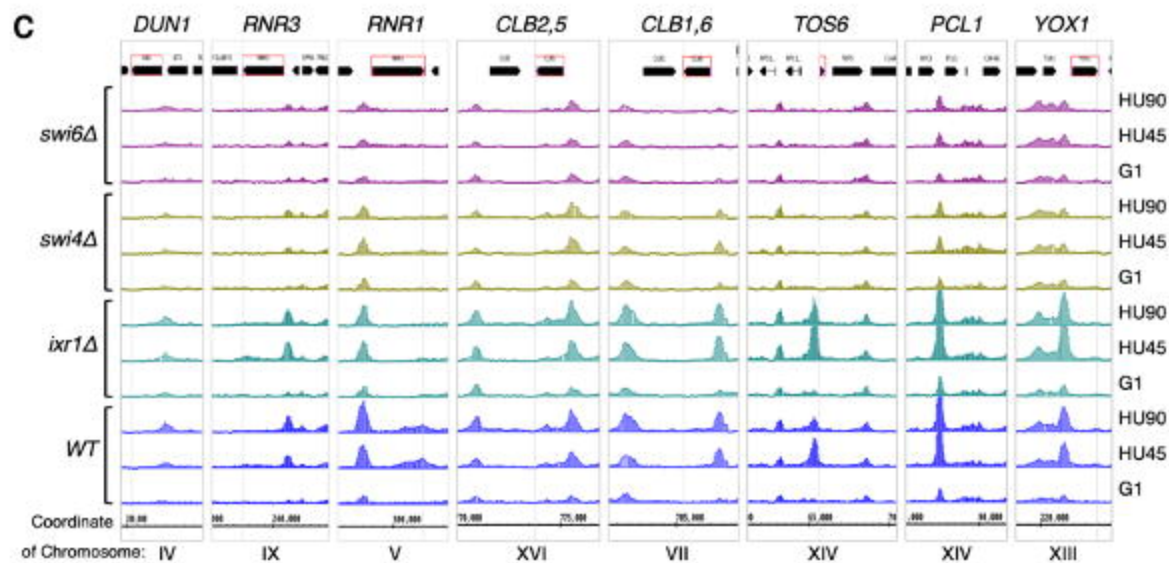



**Figure 8 – figure supplement 1**

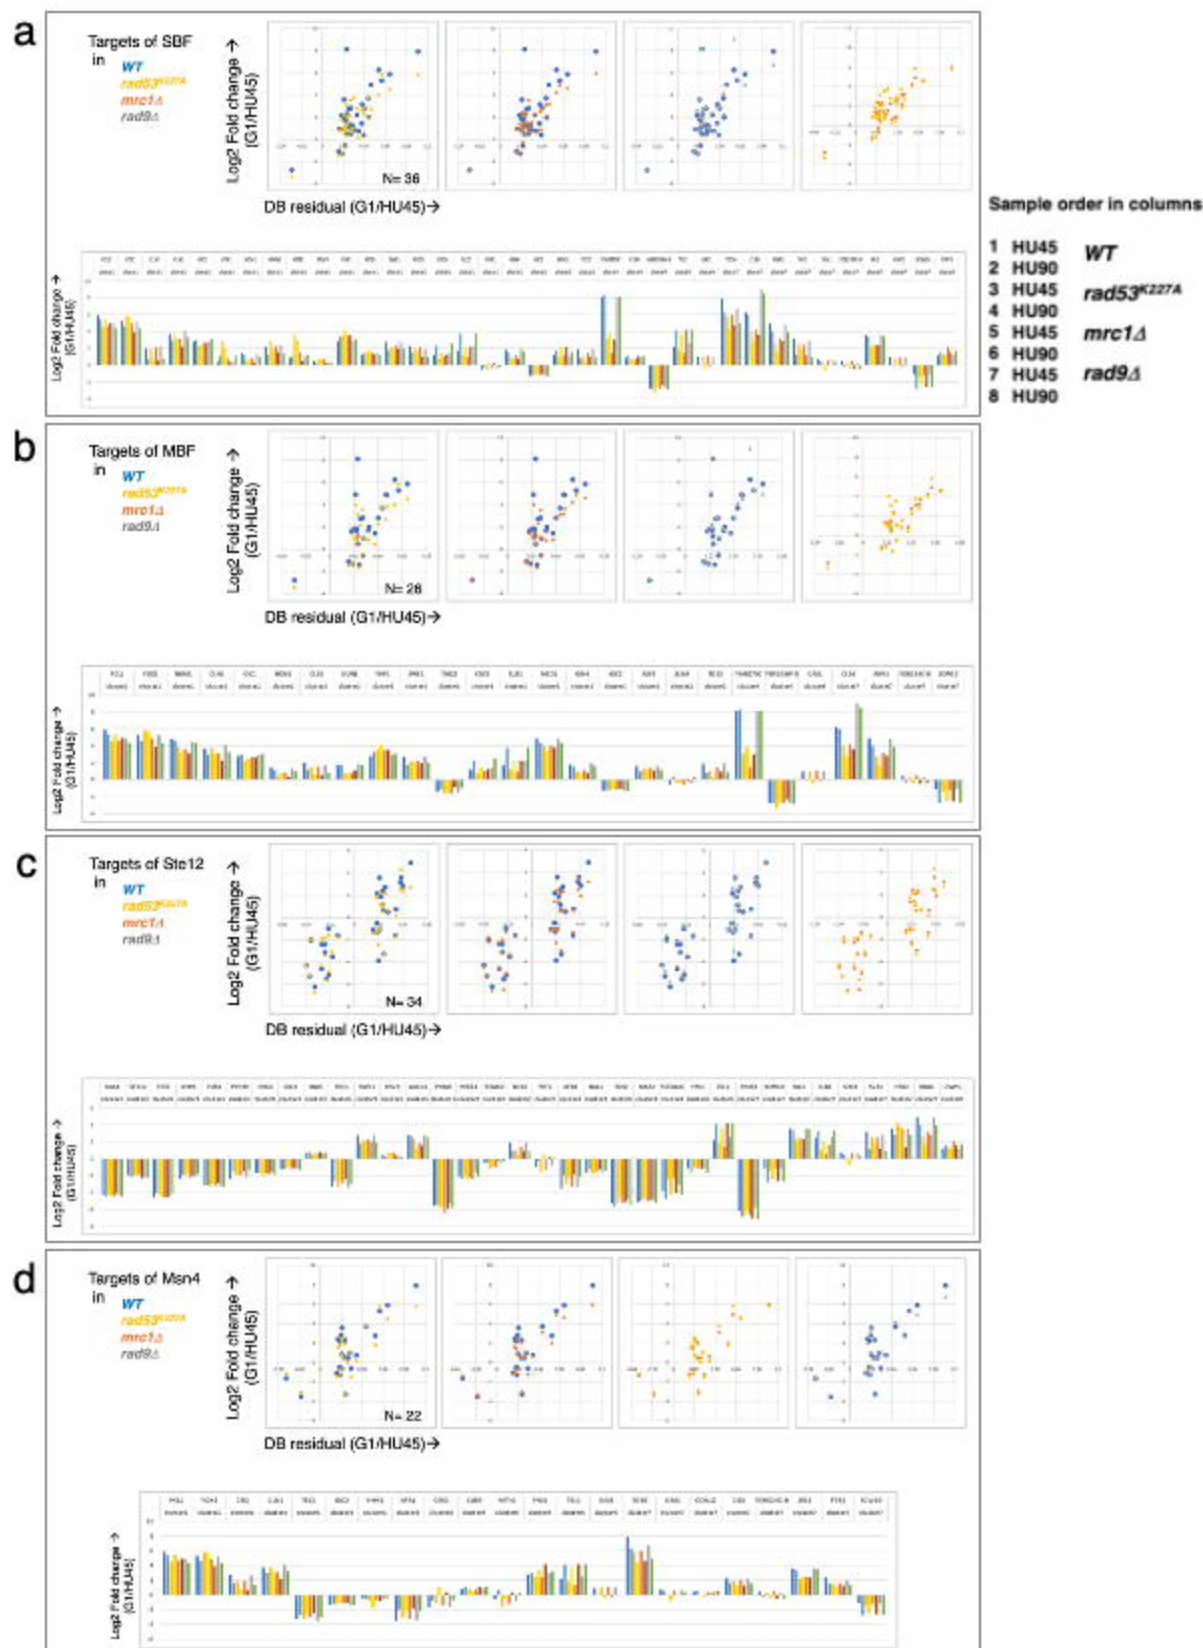

Source: https://www.biorxiv.org/content/10.1101/2021.05.23.445333v2.full.pdf
